# 1 **Competition within low-density bacterial populations as an unexpected factor** 2 **regulating carbon decomposition in bulk soil**

3 Alexandre Coche<sup>a\*</sup>, Tristan Babey<sup>b</sup>, Alain Rapaport<sup>c</sup>, Laure Vieublé Gonod<sup>d</sup>, Patricia Garnier<sup>d</sup>,  
4 Naoise Nunan<sup>e,f</sup>, Jean-Raynald de Dreuzy<sup>a</sup>

5 <sup>a</sup> Univ Rennes, CNRS, Géosciences Rennes - UMR 6118, F-35000 Rennes, France

6 <sup>b</sup> Stanford University, Department of Earth System Science, Stanford, USA

7 <sup>c</sup> MISTEA, Univ. Montpellier, INRAE, Montpellier SupAgro, France

8 <sup>d</sup> UMR Ecosys, INRAE, AgroParisTech, Université Paris-Saclay, 78850, Thiverval Grignon, France

9 <sup>e</sup> Sorbonne Université, CNRS, IRD, INRAE, P7, UPEC, Institute of Ecology and Environmental Sciences—Paris,  
10 4 place Jussieu, 75005 Paris, France

11 <sup>f</sup> Department of Soil & Environment, Swedish University of Agricultural Sciences, P.O. Box 7014, 75007  
12 Uppsala, Sweden

13 \* Corresponding author. *E-mail address*: alexandre.co@hotmail.fr (A. Coche)

## 14 **Abstract**

15 Bacterial decomposition of organic matter in soils is generally believed to be mainly controlled by the  
16 access bacteria have to their substrate. The influence of bacterial traits on this control has, however,  
17 received little attention. Here, we develop a bioreactive transport model to screen the interactive impacts  
18 of dispersion and bacterial traits on mineralization. We compare the model results with two sets of  
19 previously performed cm-scale soil-core experiments in which the mineralization of the pesticide 2,4-D was  
20 measured under well-controlled initial distributions and transport conditions. Bacterial dispersion away

21 from the initial substrate location induced a significant increase in 2,4-D mineralization, revealing the  
22 existence of a regulation of mineralization by the bacterial decomposer density, in addition to the dilution  
23 of substrate. This regulation of degradation by density becomes dominant for bacteria with an efficient  
24 uptake of substrate at low substrate concentrations (a common feature of oligotrophs). The model output  
25 suggests that the distance between bacteria adapted to oligotrophic environments is a stronger regulator  
26 of degradation than the distance between these bacteria and the substrate initial location. Such  
27 oligotrophs, commonly found in soils, compete with each other for substrate even at remarkably low  
28 population densities. The ratio-dependent Contois growth model, which includes a density regulation in  
29 the expression of the uptake efficiency, provide a more versatile representation than the substrate-  
30 dependent Monod model in these conditions. In view of their strong interactions, bioreactive and transport  
31 processes cannot be handled independently but should be integrated, in particular when reactive  
32 processes of interest are carried out by oligotrophs.

33 *Keywords:* biodegradation of organic matter; heterogeneous spatial distributions; bioreactive transport  
34 model; competition for substrate; bacterial traits; ratio-dependent growth

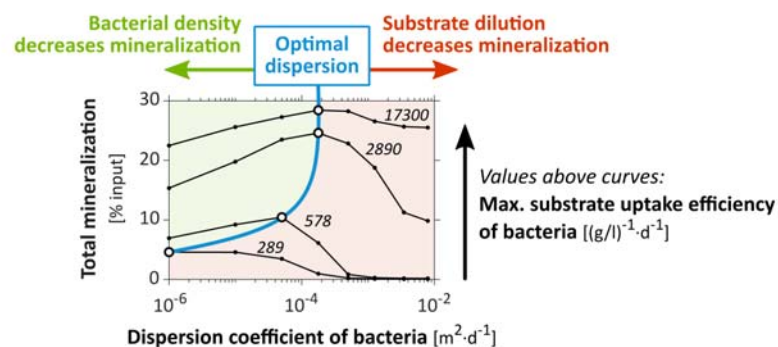

35

## 36 Highlights

- 37 - The impact of spatial distributions on decomposition depends on bacterial traits
- 38 - Decomposition can be reduced by competition between bacteria even at low densities

- 39 - Bacterial density regulation counterbalances substrate accessibility regulation
- 40 - Regulation of decomposition by bacterial density is more acute for oligotrophs

## 41 **1. Introduction**

42 Organic carbon is involved in most ecological functions provided by soils (Bünemann et al., 2018). Its  
43 cycling in soil depends upon the activity of microorganisms. Soluble organic molecules are taken up as  
44 substrates by specific populations of soil bacteria, and degraded inside the cells by endoenzymes to  
45 provide carbon and energy. This is precisely the case for the 2,4-Dichlorophenoxyacetic acid (2,4-D) used in  
46 this study as a generic model compound (Don and Weightman, 1985; Pieper et al., 1988; Boivin et al.,  
47 2005). Bacterial degradation of soil carbon has generally been modeled with the Monod equation, where  
48 the specific substrate uptake rate is controlled by substrate concentration and bacterial traits such as the  
49 maximum specific growth rate, the yield (or carbon use efficiency) and the “maximum uptake efficiency”  
50 (e.g. Monod, 1949; Sinton et al., 1986; Cheyns et al., 2010). With the Monod equation, at the lowest  
51 substrate concentration, the specific uptake rate is linearly proportional to the substrate concentration.  
52 The proportionality factor is referred to here as the “maximum uptake efficiency” and it reflects the  
53 maximal ability of the cell to capture substrate molecules that collide with its membrane (Button, 1978,  
54 1983). The maximum uptake efficiency can also be understood as the volume from which a cell can harvest  
55 substrate per unit of time, as used in some studies (Desmond-Le Quémener and Bouchez, 2014; Nunan et  
56 al., 2020; Ugalde-Salas et al., 2020). Each bacterium is assumed to be exposed to the whole substrate  
57 concentration of its surroundings, without any limitation by the population density (Lobry and Harmand,  
58 2006).

59 The direct contact (exposure) between bacteria and substrate depends on their spatial distributions  
60 (Holden and Firestone, 1997; Nunan et al., 2007). Bacteria and substrate are both heterogeneously  
61 distributed as a result of numerous biotic and abiotic processes (Dechesne et al., 2014; Kuzyakov and

62 Blagodatskaya, 2015). There are complex feedback loops between these distributions, dispersive transport  
63 processes such as diffusion and hydrodynamic dispersion (Madsen and Alexander, 1982; Breitenbeck et al.,  
64 1988), and the bacterial activity itself such as consumption and growth (Poll et al., 2006).

65 Aggregated bacterial distributions, as observed at mm-scale for 2,4-D degraders (Vieublé Gonod et al.,  
66 2003), have been shown to decrease degradation rates when the distribution of substrate is homogeneous  
67 (Pallud et al., 2004; Dechesne et al., 2010). Yet, the role of bacterial metabolic traits on the impact of  
68 bacterial and substrate distributions on degradation remains mostly unknown, especially when substrate  
69 and bacteria are heterogeneously and dynamically redistributed in soils over  $\mu\text{m}$ -to-cm scales by numerous  
70 spatial disturbances (Madsen and Alexander, 1982; Breitenbeck et al., 1988; König et al., 2020). We  
71 investigated the extent to which bacterial activity and transport processes can be treated independently or  
72 should be integrated to characterize, understand and predict degradation under various advective,  
73 diffusive and dispersive conditions. The simultaneous characterization of the impacts of bacterial traits and  
74 transport parameters through their mutual interactions is methodologically challenging. It requires several  
75 well-controlled experiments in comparable degradation conditions, with specific spatial distributions of  
76 substrate and degraders in specific transport conditions, and a spatiotemporal monitoring of the different  
77 carbon pools.

78 Among the scarce relevant datasets (e.g. Dechesne et al., 2010), we used the two sets of cm-scale soil-core  
79 experiments performed by Pinheiro et al. (2015, 2018), in which the degradation of 2,4-D under different  
80 initial spatial distributions and transport conditions was measured in similar repacked soil columns. Mostly  
81 reported independently, they have shown first that the proximity between bacteria and the initial location  
82 of a heterogeneously distributed substrate exerts a strong control on mineralization. Mineralization was  
83 greater when bacteria were close to the initial location of substrate, even though most of the initial soluble  
84 substrate diffused away from its initial location. This was attributed to the fact that bacteria located far  
85 from the initial substrate location were only exposed to highly diluted substrate concentrations (Babey et

86 al., 2017). However, the hydrodynamic dispersion of both bacteria and substrate away from their initial  
87 location caused a greater than four-fold increase in the mineralization of substrate that was not leached  
88 out, to the point that it almost reached the same performance as in homogeneous conditions in which  
89 there was no dilution (Pinheiro et al., 2018). The surprising increase in mineralization suggests a regulation  
90 of mineralization by population density compensating the effect of substrate dilution, the activity of  
91 bacteria being enhanced when their density is diluted by the dispersive percolation events. While such  
92 regulations by bacterial density have not yet been considered in soils, presumably because of the  
93 extremely low apparent bacterial densities found in soils (Young et al., 2008), they are well known in  
94 bioreactors, where they are usually modeled by the ratio-dependent Contois growth law (Contois, 1959;  
95 Harmand and Godon, 2007).

96 In order to determine the relevance of the putative bacterial decomposer density effect on decomposition,  
97 we developed a quantitative approach to model the two sets of experiments within the same unified  
98 framework (section 2). We assessed the relevance of previously developed models, improved the  
99 calibration of a Monod-based model and investigated an alternative Contois-based model (section 3). We  
L00 discuss the implication of the results on the controlling factors of soil organic carbon cycling, on the  
L01 relevant bacterial growth models and on the possible bacterial strategies (section 4).

## L02 **2. Models and methods**

### L03 ***2.1. Experiment scheme, geometry and initial distributions***

L04 We briefly introduce the experiments performed previously and highlight aspects of the experiments that  
L05 are important for the modeling (**Fig. 1**). The full experimental setting is presented in the supplementary  
L06 materials (**Fig. S1** and **Table S1**) for the sake of completeness. Soil columns were packed with two  
L07 homogeneous or heterogeneous arrangements of soil cubes, either sterilized, or hosting the indigenous

L08 microbial communities (referred to as “degraders”) and amended with  $^{14}\text{C}$ -labelled 2,4-D (referred to as  
L09 “substrate”). Two sets of experiments, referred to as “hydrostatic” and “percolation” conditions, were  
L10 performed respectively with only substrate diffusion (Pineiro et al., 2015), or with additional substrate  
L11 and bacterial advection and dispersion caused by water percolation (Pineiro et al., 2018). The initial  
L12 locations of the bacteria and substrate were set in the model according to the experimental conditions  
L13 (**Fig 1A**). Initial concentrations used in the model are detailed in **Table 1**. In the experiments, the mass of  
L14 mineralized  $^{14}\text{C}$  derived from the degradation of the labelled 2,4-D was monitored at the core scale during  
L15 at least two weeks (**Fig. 1B**). These data were used to confront the model processes with a physical system,  
L16 as detailed in section 2.5.

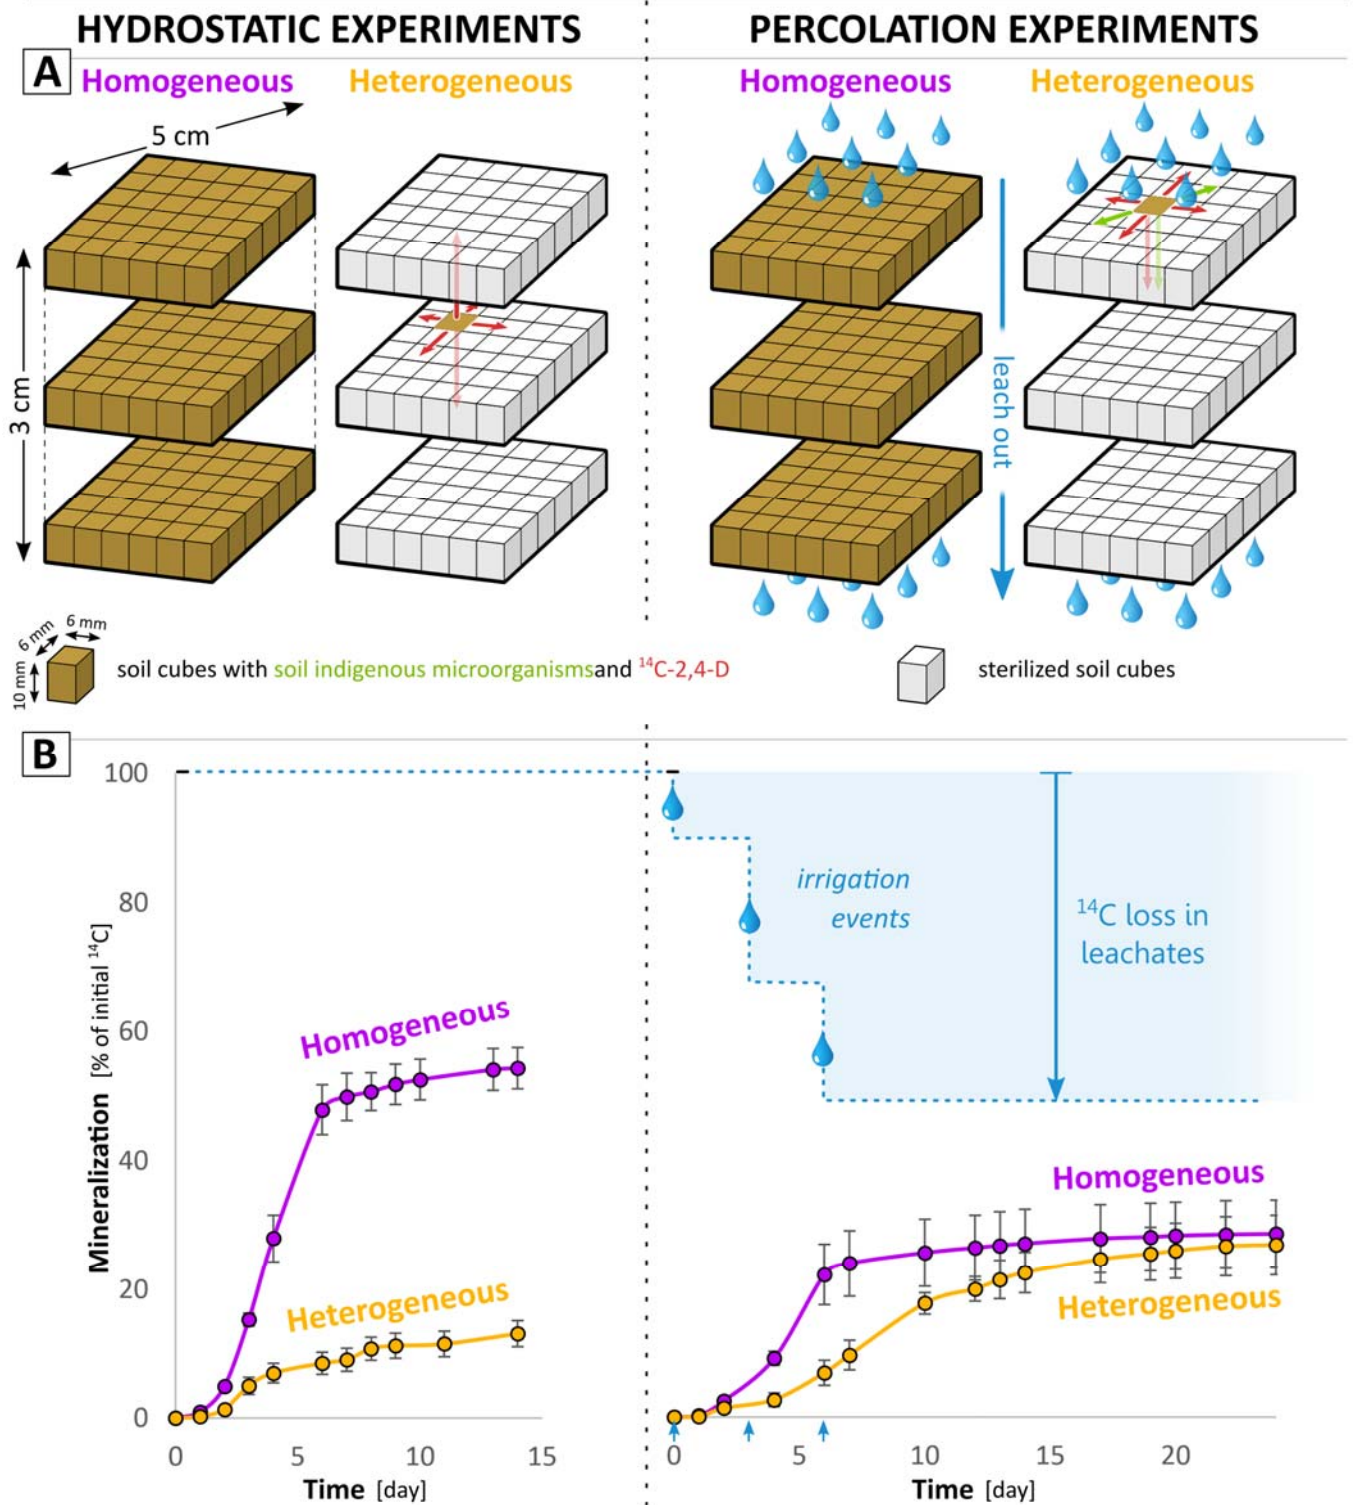

L17

L18 **Fig. 1.** Model experimental design, geometry and initial distributions (A) based on previously performed

L19 experiments in hydrostatic (Pinheiro et al., 2015) and percolation (Pinheiro et al., 2018) conditions. The red

L20 and green arrows refer respectively to the 2,4-D and degrader modeled displacements. (B) Experimental

L21 cumulated production of CO<sub>2</sub> (adapted from Pinheiro et al. (2018, 2015), permission for reproduction  
 L22 granted by Elsevier).

## L23 **2.2. Bioreactive model**

L24 The bioreactive model extends the model published by Babey et al. (2017) (**Fig. 2**) to account for Contois  
 L25 growth law as an alternative to Monod's. The sorption processes, the bacterial lag phase and the nutrient  
 L26 recycling described below were previously discussed and their use justified in Babey et al. (2017) to  
 L27 consistently represent the experimental data. The  $r(\cdot)$  notation expresses the reaction rates of the  
 L28 biochemical dynamics that are expressed as follows:

$$r(S) = k_{AS} A - k_{SA} S - k_R S - \frac{\mu}{y} B + m_t \chi B \quad (1)$$

$$r(A) = k_{SA} S - k_{AS} A \quad (2)$$

$$r(R_S) = k_R S \quad (3)$$

$$r(CO_2) = \frac{(1-y)}{y} \mu B \quad (4)$$

$$r(B) = \mu B - m_t B \quad (5)$$

$$r(R_B) = m_t (1 - \chi) B \quad (6)$$

L29 All variable and parameter definitions are listed in **Table 1**. The dynamics of the specific growth rate  $\mu$  are  
 L30 given, for the Monod-based model, by:

$$\frac{\partial \mu}{\partial t} = \alpha \left( \mu_{max} \frac{S}{\kappa_M + S} - \mu \right) \quad (7)$$

L31 and, for the Contois-based model, by:

$$\frac{\partial \mu}{\partial t} = \alpha \left( \mu_{max} \frac{S/B}{\kappa_C + S/B} - \mu \right) = \alpha \left( \mu_{max} \frac{S}{\kappa_C B + S} - \mu \right) \quad (8)$$

L32 where  $\mu = 0$  at  $t = 0$ .



L33 The soluble substrate  $S$  is either reversibly adsorbed to soil particles (pool  $A$ ) or irreversibly adsorbed (pool  
L34  $R_S$ ) (Eqs. (1), (2), (3)), or taken up by bacteria  $B$  (Eq. (1)) and metabolized into  $CO_2$  (Eq. (4)) and new  
L35 biomass  $B$  (Eq. (5)).  $k_{SA}$  and  $k_{AS}$  are the reversible sorption coefficients.  $k_R$  is the irreversible one. Bacteria  
L36 death occurs at a constant rate  $m_t$  (Eq. (5)) and a fraction of the bacterial necromass is considered to return  
L37 to the soluble substrate pool  $S$  to account for nutrient recycling (Eq. (1)), while the rest is transformed to  
L38 biotic residues  $R_B$  (Eq. (6)). The nutrient recycling is necessary to adequately predict the late dynamics of  
L39 mineralization. Its impact on mineralization is only marginal during the first five days. The adsorbed  
L40 substrate and biotic residues form the pool of insoluble carbon  $A + R_S + R_B$ . The substrate  $S$  is consumed by  
L41 bacteria  $B$  according to their specific uptake rate  $(1/y) \cdot \mu$  expressed either by the substrate-dependent  
L42 Monod growth law (Eq. (7)) (Monod, 1949) or by the ratio-dependent Contois growth law (Eq. (8)) (Contois,  
L43 1959).  $y$  is the yield coefficient and relates the specific uptake rate  $(1/y) \cdot \mu$  to the specific growth rate  $\mu$ .  
L44  $\mu_{max}$  is the maximum specific growth rate.  $\kappa_M$  and  $\kappa_C$  are Monod and Contois constants respectively. The  
L45 effective uptake is delayed by the accommodation rate  $\alpha$ , which explicitly takes into account the “memory”  
L46 effects of the bacteria when adapting to new conditions (Patarinska et al., 2000). This delay is necessary to  
L47 capture the mineralization lag time at the beginning of the experiments (see **Fig. S6**). Over long time  
L48 periods ( $t \gg 1/\alpha$ ),  $\mu$  follows the exact expression of the Monod or Contois equations. All modeled pools ( $S$ ,  
L49  $B$ ,  $CO_2$ ,  $A$ ,  $R_S$  and  $R_B$ ) were expressed as carbon concentrations in  $\mu\text{g}\cdot\text{g}^{-1}$  (mass of carbon per mass of dry  
L50 soil) considering a soil water content of  $0.205 \text{ g}\cdot\text{g}^{-1}$  (mass of water per mass of dry soil), a bulk density of  
L51 the soil column of  $1.3 \cdot 10^3 \text{ g}\cdot\text{l}^{-1}$  (mass of dry soil per apparent soil volume) and an average bacterial dry  
L52 weight of  $2.8 \cdot 10^{-13} \text{ g}$  corresponding to  $1.49 \cdot 10^{-13} \text{ g}$  of carbon per cell. These values of water content and  
L53 bulk density were those set up in the experiments, the latter corresponding to a water potential adjusted  
L54 at  $-31.6 \text{ kPa}$  (pF 2.5). The average bacterial weight was assumed based on Dechesne et al. (2010) and  
L55 Pinheiro et al. (2015). The water-filled pore space (54%, volume of water per volume of pores) was such  
L56 that oxygen was not considered a limiting factor for 2,4-D degradation.

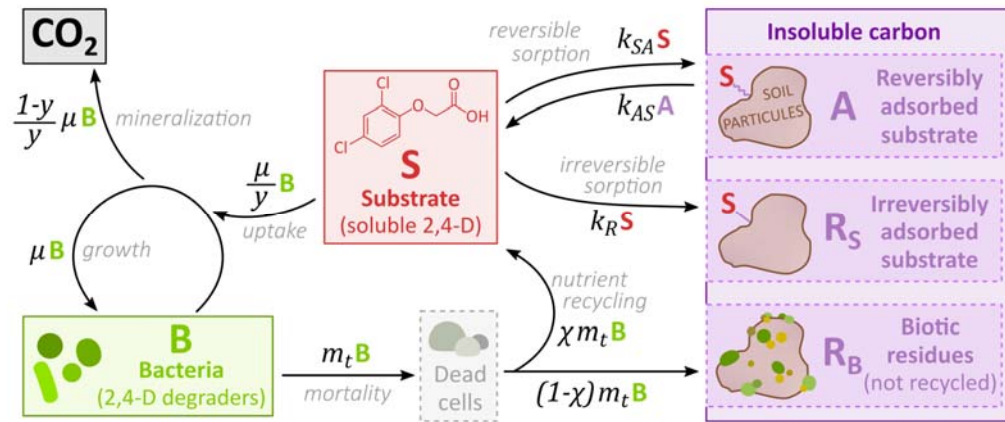

L57

L58 **Fig. 2.** Graphical representation of the biochemical model and carbon fluxes identified by the arrows.

L59 Under low substrate concentrations  $S$ , the specific uptake rate  $(1/y) \cdot \mu$  becomes equal to  $S \cdot (1/y) \cdot \mu_{max}/K_M$ ,

L60 where  $(1/y) \cdot \mu_{max}/K_M$  is referred to as the “maximum uptake efficiency”.

### L61 **2.3. Reactive transport model**

L62 The transport model is based on the diffusion model of Babey et al. (2017) to which advective-dispersive  
 L63 processes explored in the experiments of Pinheiro et al. (2018) are added. Bacterial leaching out and  
 L64 dispersion were observed only in the percolation experiments while the substrate was also reported to  
 L65 diffuse. Hydrodynamic leaching and dispersion were modeled independently, as they result from,  
 L66 respectively, bypass flow through large pores and complex hydrodynamic dispersion processes coming not  
 L67 only from usual flow mechanisms but also from large saturation variations and local redistribution of  
 L68 moisture in the pore network. Due to the lack of adequate experimental data to characterize the details of  
 L69 the dispersion process, we applied a simple isotropic dispersion coefficient. Complementary numerical  
 L70 simulations show that other anisotropic dispersion parameterization are only weakly sensitive (**Fig. S3**).  
 L71 Bacterial and substrate transports were described with the same advective and dispersive parameters. This  
 L72 assumption did not significantly alter the results (**Fig. S4**). Coupled to the equations of the bioreactive  
 L73 model ((1)-(8)), the full reactive transport model is given by:

$$\frac{\partial S}{\partial t} = r(S) + \nabla(d_{diff}\nabla S) + G(\nabla(d_{disp}\nabla S) - \nu S) \quad (9)$$

$$\frac{\partial B}{\partial t} = r(B) + G(\nabla(d_{disp}\nabla B) - \nu B) \quad (10)$$

$$\frac{\partial U}{\partial t} = r(U) \quad \text{for } U = A, R_B, R_S \text{ and } CO_2 \quad (11)$$

L74 where  $d_{diff}$  is the effective molecular diffusion coefficient of  $S$ ,  $d_{disp}$  is the effective hydrodynamic dispersion  
L75 coefficient of  $S$  and  $B$  and  $\nu$  is their leaching rate. Note that the dispersion coefficient  $d_{disp}$  mostly affected  
L76 the spreading of bacteria, given that substrate was mainly spread by diffusion, as noted in section 2.3 and  
L77 confirmed by consistent results from equivalent models without hydrodynamic dispersion of  $S$  (**Fig. S5**).  
L78 Effective diffusion and dispersion processes were assumed to be isotropic and uniform at the column-scale.  
L79 Dispersion and leaching were active only during the observed 1-hour percolation events at days 0, 3 and 6  
L80 as controlled by the function  $G$  defined as:

$$G(t) = 1 \quad t = [0d - 0d1h]; [3d - 3d1h]; [6d - 6d1h] \quad (12)$$
$$G(t) = 0 \quad \text{otherwise.}$$

L81 No-flow boundary conditions were imposed at the edges of the soil core ( $\nabla S = 0$  and  $\nabla B = 0$ ) during periods  
L82 outside of the percolation events. The transient evolutions of the water content and their effects on  
L83 concentrations were not considered because of the short duration of the percolation events (1 h) and the  
L84 absence of detectable effects on the experimental mineralization curve around the percolation events  
L85 (**Fig. 1D**). Hydration conditions were considered constant, constrained by the water potential adjusted to  
L86 -31.6 kPa. No bacterial mobility was observed in the hydrostatic experiments, suggesting that the bacterial  
L87 mobility observed in the percolation experiments resulted primarily from hydrodynamic dispersion.  
L88 Carbon pools concentration dynamics were simulated on a  $3 \times 6 \times 6$  regular mesh grid. Although the shape  
L89 of the grid was slightly different from that of the cylindrical soil-core, it did not have any observable impact

L90 (Babey et al., 2017). We recall that substrate and bacteria were initially co-located in the same cube(s).  
L91 Each cube was considered to be physically, chemically and biologically homogeneous. Diffusion and  
L92 dispersion were simulated using a finite-difference scheme (Iserles, 2009) and coupled with the bioreactive  
L93 model, itself solved by the 4<sup>th</sup> order Runge-Kutta integration method function of MATLAB (Shampine and  
L94 Reichelt, 1997). The coupling of transport and bioreactive models was achieved with a sequential  
L95 non-iterative operator-splitting method, in which the equations are resolved within each time step in a  
L96 sequence of one transport step followed by one bioreactive step (Carrayrou et al., 2004; Lagneau and van  
L97 der Lee, 2010). The time steps were smaller than the characteristic diffusion and reaction times to avoid  
L98 any coupling issues.

#### L99 **2.4. Exploratory screening**

200 Parameters and their values are listed in **Table 1**. Sorption parameters and the diffusion coefficient were  
201 set at values that were calibrated and validated by Babey et al. (2017) in independent experiments without  
202 degradation. The mortality rate and the nutrient recycling yield were also kept at the values calibrated in  
203 Babey et al. (2017) as they were considered to be well constrained by the residual mineralization dynamics  
204 of the homogeneous hydrostatic experiment (**Fig. 1D**). The four biological parameters primarily involved in  
205 the biological response of bacteria to the concentration of substrate were determined to be  $(1/y) \cdot \mu_{max}$ ,  $\alpha$ ,  
206  $B(t=0)$  and either  $(1/y) \cdot \mu_{max} / \kappa_M$  for the Monod-based model or  $(1/y) \cdot \mu_{max} / (B(t=0) \cdot \kappa_C)$  for the  
207 Contois-based model. Each of these four parameters were sampled over 7 logarithmically-distributed  
208 values within the theoretically and physically relevant ranges given by Babey et al. (2017), and all possible  
209 combinations of values were screened (**Table S2**). We recall that the “maximum uptake efficiency”  
210  $(1/y) \cdot \mu_{max} / \kappa_M$  characterizes the specific bacterial uptake of substrate at the lowest substrate concentration  
211 (Button, 1991), while the maximum specific uptake rate  $(1/y) \cdot \mu_{max}$  characterizes the bacterial uptake at the  
212 highest substrate concentration. Note that the uptake yield  $y$  was fixed at the value calibrated by Babey et

213 al. (2017) with a high degree of certainty. The initial maximum uptake efficiency  $(1/y) \cdot \mu_{max} / (B(t=0) \cdot \kappa_C)$  in  
 214 the Contois-based model was screened in the same range as  $(1/y) \cdot \mu_{max} / \kappa_M$ . The accommodation rate  $\alpha$  of  
 215 the degrader response ranged from a negligible delay of few minutes ( $\alpha = 934 \text{ d}^{-1}$ ) to a prolonged delay of  
 216 around 10 days ( $\alpha = 9.34 \cdot 10^{-2} \text{ d}^{-1}$ ).  $B(t=0)$  values were screened around the initial experimental  
 217 measurements of the *tfdA* gene copy number, assuming that one *tfdA* sequence corresponded to one  
 218 bacterium. They ranged over two orders of magnitude to account for the uncertainty of the conversion of  
 219 *tfdA* copy number into alive 2,4-D degraders (Bælum et al., 2006, 2008). Bacterial density in the uptake  
 220 efficiency expression will also be expressed in  $\text{g} \cdot \text{l}^{-1}$  (mass of bacteria per volume of water) for a more direct  
 221 comparison with the relevant literature.

222 The spatial distribution of bacteria observed at the end of the experiments could not be used to determine  
 223 the effective dispersion coefficient  $d_{disp}$  (**Fig. S2**). While they qualitatively ascertained that bacteria spread  
 224 orthogonally to the percolation direction, experimental data were not sufficiently resolved to be used  
 225 quantitatively. The dispersion coefficient was thus screened over 10 values ranging from no dispersion  
 226 ( $d_{disp} = 0$ ) to complete instant homogenization of the soil core ( $d_{disp} = \text{inf}$ ) (**Table S2**). The effective diffusion  
 227 coefficient  $d_{diff}$  had been calibrated independently from percolation conditions (Pinheiro et al., 2015; Babey  
 228 et al., 2017). The leaching rates  $v$  were determined based on the experimental masses of leached  $^{14}\text{C}$   
 229 (Pinheiro et al., 2018) (**Table 1**). Detailed values for the screened parameters are listed in **Table S2**.

230 **Table 1.** Values and range of values of the reactive transport model. The effective dispersion coefficient  
 231  $d_{disp}$  applies only to heterogeneous percolation experiments.  $B(t=0)$  is the initial density of bacteria in the  
 232 natural cubes. It is considered 1.6 times smaller in the percolation experiments than in the hydrostatic  
 233 experiments according to the initial experimental measurements.

| Parameter description | Symbol | Unit | Fixed values and admissible ranges for screening |
|-----------------------|--------|------|--------------------------------------------------|
|-----------------------|--------|------|--------------------------------------------------|

|                                                         |                           |                                                                                         |                                                                                                                    |                               |
|---------------------------------------------------------|---------------------------|-----------------------------------------------------------------------------------------|--------------------------------------------------------------------------------------------------------------------|-------------------------------|
| initial substrate concentration                         | hydrostatic experiments   | $S(t=0)$                                                                                | $\mu\text{g}\cdot\text{g}^{-1}$ (mass of substrate carbon per mass of dry soil)                                    | 0.825 <sup>b</sup>            |
|                                                         | percolation experiments   |                                                                                         | $\mu\text{g}\cdot\text{g}^{-1}$                                                                                    | 6.52 <sup>b</sup>             |
| reversible adsorption coefficient                       |                           | $k_{SA}$                                                                                | $\text{d}^{-1}$                                                                                                    | 0.09207                       |
| reversible desorption coefficient                       |                           | $k_{AS}$                                                                                | $\text{d}^{-1}$                                                                                                    | 4.361                         |
| irreversible adsorption coefficient                     |                           | $k_C$                                                                                   | $\text{d}^{-1}$                                                                                                    | 0.01296                       |
| uptake yield                                            |                           | $y$                                                                                     | -                                                                                                                  | 0.5206                        |
| maximum specific uptake rate                            |                           | $(1/y)\cdot\mu_{max}$                                                                   | $\text{d}^{-1}$                                                                                                    | [0.0190 – 19.5]               |
| uptake efficiency at the lowest substrate concentration |                           | $(1/y)\cdot\mu_{max}/\kappa^a$<br>where $\kappa$ is $\kappa_M$ or $B(t=0)\cdot\kappa_C$ | $\text{g}\cdot\mu\text{g}^{-1}\cdot\text{d}^{-1}$ (mass of dry soil per mass of bacterial carbon per unit of time) | [0.0152 – 159] <sup>c</sup>   |
| accommodation rate                                      |                           | $\alpha$                                                                                | $\text{d}^{-1}$                                                                                                    | [0.00934 – 934]               |
| initial degrader population density                     | hydrostatic experiments   | $B(t=0)$                                                                                | $\mu\text{g}\cdot\text{g}^{-1}$ (mass of bacterial carbon per mass of dry soil)                                    | [0.0161 – 1.61] <sup>d</sup>  |
|                                                         | percolation experiments   |                                                                                         | $\mu\text{g}\cdot\text{g}^{-1}$                                                                                    | [0.0101 – 1.01] <sup>d</sup>  |
| mortality rate                                          |                           | $m_t$                                                                                   | $\text{d}^{-1}$                                                                                                    | 0.0602                        |
| nutrient recycling yield                                |                           | $\chi$                                                                                  | -                                                                                                                  | 0.6010                        |
| effective diffusion coefficient                         |                           | $d_{diff}$                                                                              | $\text{m}^2\cdot\text{d}^{-1}$                                                                                     | $1\cdot 10^{-5}$ <sup>e</sup> |
| effective dispersion coefficient                        |                           | $d_{disp}$                                                                              | $\text{m}^2\cdot\text{d}^{-1}$                                                                                     | [0 – $\infty$ ]               |
| leaching rates (days 0; 3; 6)                           | homogeneous experiments   | $v$                                                                                     | -                                                                                                                  | 0.108; 0.226; 0.180           |
|                                                         | heterogeneous experiments |                                                                                         |                                                                                                                    | 0.107; 0.223; 0.178           |

234 <sup>a</sup> The half-saturation constant  $\kappa$  corresponds to  $\kappa_M$  for the Monod-based model and  $B(t=0)\cdot\kappa_C$  for the

235 Contois-based model (where  $B(t=0)$  is the value from the hydrostatic experiments).

236 <sup>b</sup> The initial substrate concentration  $S(t=0)$  is set equal to the <sup>14</sup>C-2,4-D concentration amended in the  
237 experiments.

238 <sup>c</sup> The values of  $(1/y) \cdot \mu_{max}/\kappa$  correspond to ranges of  $[1.65 - 1.73 \cdot 10^4] \text{ l} \cdot \text{g}^{-1} \cdot \text{d}^{-1}$  (volume of water per mass of  
239 bacteria per unit of time)

240 <sup>d</sup> The values of  $B(t=0)$  correspond respectively to ranges of  $[1.48 \cdot 10^{-4} - 1.48 \cdot 10^{-2}] \text{ g} \cdot \text{l}^{-1}$  (mass of bacteria per  
241 volume of water) for the hydrostatic experiments and  $[9.24 \cdot 10^{-5} - 9.24 \cdot 10^{-3}] \text{ g} \cdot \text{l}^{-1}$  for the percolation  
242 experiments.

243 <sup>e</sup> The value of  $d_{diff}$  has been calibrated on a  $3 \times 6 \times 6$  grid in similar conditions (Babey et al., 2017).

## 244 **2.5. Model to data comparison**

245 The comparison between the results of the model and the experimental data was based on the core-scale  
246 data of mineralization deduced from the carbon mass  $m_{CO_2}$  of <sup>14</sup>CO<sub>2</sub> emissions:

$$m_{CO_2}(t) = \int_V C_{O_2}(x, t) dx \quad (13)$$

247 with  $V$  the volume of the soil cores. Mineralization at a given time  $t$  was expressed as the carbon mass of  
248 cumulated <sup>14</sup>CO<sub>2</sub> emissions ( $m_{CO_2,q}(t)$ ) per initial carbon mass of <sup>14</sup>C-substrate  $S$  ( $m_{S,q}(t=0)$ ) where the  
249 index  $q$  identifies the experiment at hand. Indices 1, 2, 3 and 4 are respectively given to the homogeneous  
250 hydrostatic, heterogeneous hydrostatic, homogeneous percolation and heterogeneous percolation  
251 experiments. Data-to-model adequacy was assessed for each of the experiments by a classical root-mean-  
252 square evaluation function  $J_q$  comparing the modeled mineralization of Eq.(4) to the measured  
253 mineralization at the  $n_q$  available sampling times  $t_i$ :

$$J_q = \left( \frac{1}{n_q} \sum_{i=1}^{n_q} \left( \frac{m_{CO_2,q}^{mod}(t_i) - m_{CO_2,q}^{data}(t_i)}{m_{S,q}(t=0)} \right)^2 \right)^{\frac{1}{2}} \quad (14)$$

254 Discrepancies over the full set of experiments  $J_{1234}$  were thus expressed as:

$$J_{1234} = \left( \frac{1}{4} \sum_{k=1}^4 J_k^2 \right)^{\frac{1}{2}} \quad (15)$$

255 Following the systematic parameter screening described in section 2.5, the parameter set minimizing  $J_{1234}$   
256 was determined and referred to as the set calibrated on both hydrostatic and percolation experiments. The  
257 measurement errors were in average 1.7 times higher in the percolation experiments than in the  
258 hydrostatic experiments. This was assumed to be due to differences in experimental setup between the  
259 two sets of experiments of Pinheiro et al. (2015, 2018). This error difference contributed to limit the weight  
260 of the percolation experiments when determining the best-fitting parameter set over the whole set of  
261 experiments ( $J_{1234}$ ). We made the choice to give an equal weight to all experiments by only taking into  
262 account the average CO<sub>2</sub> values.

## 263 **3. Results**

### 264 **3.1. Model calibration**

265 The calibration of the bioreactive transport model carried out using only the hydrostatic experimental data  
266 (Babey et al., 2017) led to a minimal discrepancy between data and model of  $J_{12} = 0.023$  (**Fig. 3-A1 and A2**).  
267 This pre-existing parameterization was used to provide blind predictions of the percolation experiments,  
268 with the effective dispersion coefficient  $d_{disp}$  as an additional fitting parameter. It gave a reasonable  
269 prediction of mineralization in the homogeneous percolation experiment ( $J_3 = 0.038$ , **Fig. 3-A3**) but failed in  
270 the heterogeneous percolation experiment ( $J_4 = 0.151$ , **Fig. 3-A4**), regardless of the dispersion coefficient  
271 values. The smallest discrepancy  $J_4$  was surprisingly obtained without any bacterial dispersion ( $d_{disp} = 0$ ) in



272 contradiction with the bacterial spread observed in the experimental data (**Fig. S2**). The final predicted  
273 mineralization was highest when bacteria remained aggregated close to the initial location of the  
274 substrate. The highest predicted mineralization was however four times lower than the experimental data.  
275 The large gap between the experimental data and the modeled scenario suggests that bacterial proximity  
276 to the initial substrate location is not the underlying explanatory mechanism for the high mineralization  
277 rates. On the contrary, it suggests that mineralization might rather be increased by the dispersion of  
278 bacteria towards more diluted substrate concentrations, and that the identified bacterial traits do not  
279 match this increase of mineralization with dispersion.

280 In order to investigate the capacity of the reactive transport model to fit both hydrostatic and percolation  
281 experimental data, the biological parameters  $((1/y) \cdot \mu_{max}/\kappa_M, (1/y) \cdot \mu_{max}, \alpha, B(t=0))$  and the dispersion  
282 coefficient ( $d_{disp}$ ) were calibrated on both hydrostatic and percolation experiments following the screening  
283 approach given in section 2.4 to minimize  $J_{1234}$ . The mineralization dynamics were adequately predicted in  
284 all four experiments with the biological parameter set giving the lowest overall discrepancy ( $J_{1234} = 0.032$ )  
285 and a non-zero dispersion coefficient ( $d_{disp} = 1.78 \cdot 10^{-4} \text{ m}^2 \cdot \text{d}^{-1}$ ) (**Fig. 3, Table 2**). The non-zero dispersion  
286 coefficient indicates that the calibrated model accounts for a positive impact of bacterial dispersion on  
287 degradation. The model results suggest that this effect is necessary to successfully predict the high degree  
288 of degradation in the experimental data. Compared to the parameters calibrated only using the hydrostatic  
289 experiments, the parameter set calibrated on both hydrostatic and percolation experiments also displayed  
290 a much higher maximum uptake efficiency  $(1/y) \cdot \mu_{max}/\kappa_M = 26.5 \text{ g} \cdot \mu\text{g}^{-1} \cdot \text{d}^{-1}$  (mass of dry soil per mass of  
291 bacterial carbon per unit of time) (**Table 2**). The systematic exploration of the parameter space showed  
292 that high maximum uptake efficiency was a common feature of the 1% best-fitting parameterizations over  
293 both hydrostatic and percolation experiments (smallest  $J_{1234}$ ), with values of 159 and  $26.5 \text{ g} \cdot \mu\text{g}^{-1} \cdot \text{d}^{-1}$ ,  
294 corresponding respectively to  $1.73 \cdot 10^4$  and  $2.89 \cdot 10^3 \text{ l} \cdot \text{g}^{-1} \cdot \text{d}^{-1}$  (volume of water per mass of bacteria per unit

295 of time). It underlines the essential role of the maximum uptake efficiency for modulating the impact of  
 296 dispersion on degradation, further detailed and explained in section 3.2.3.

297 **Table 2.** Parameters for the Monod-based model calibrated by the screening approach (section 2.4) on the  
 298 hydrostatic experiments only (Babey et al., 2017) and on both hydrostatic and percolation experiments,  
 299 and for the Contois-based model calibrated on both hydrostatic and percolation experiments.

| Parameter symbol                 | Unit                                                                                                 | Monod model calibration                                            |                                               | Contois model calibration                     |                       |
|----------------------------------|------------------------------------------------------------------------------------------------------|--------------------------------------------------------------------|-----------------------------------------------|-----------------------------------------------|-----------------------|
|                                  |                                                                                                      | on the sole hydrostatic experiments                                | on both hydrostatic & percolation experiments | on both hydrostatic & percolation experiments |                       |
| $(1/y) \cdot \mu_{max}$          | d <sup>-1</sup>                                                                                      | 1.22                                                               | 9.73                                          | 4.86                                          |                       |
| $(1/y) \cdot \mu_{max}/\kappa^a$ | g·μg <sup>-1</sup> ·d <sup>-1</sup> (mass of dry soil per mass of bacterial carbon per unit of time) | 2.65 <sup>b</sup>                                                  | 26.5 <sup>b</sup>                             | 2.65 <sup>b</sup>                             |                       |
| $\alpha$                         | d <sup>-1</sup>                                                                                      | 9.341 10 <sup>-1</sup>                                             | 9.34 10 <sup>-2</sup>                         | 9.34 10 <sup>-2</sup>                         |                       |
| $B(t=0)$                         | hydrostatic experiments                                                                              | μg·g <sup>-1</sup> (mass of bacterial carbon per mass of dry soil) | 1.61 10 <sup>-1</sup>                         | 3.23 10 <sup>-2</sup>                         | 3.76 10 <sup>-1</sup> |
|                                  | percolation experiments                                                                              | μg·g <sup>-1</sup>                                                 | 1.01 10 <sup>-1</sup>                         | 2.01 10 <sup>-2</sup>                         | 2.34 10 <sup>-1</sup> |
| $d_{disp}$                       | m <sup>2</sup> ·d <sup>-1</sup>                                                                      | 0 <sup>c</sup>                                                     | 1.78 10 <sup>-4 c</sup>                       | 10 <sup>-5 c</sup>                            |                       |
| $J_{1234}$                       | -                                                                                                    | 0.079                                                              | 0.032                                         | 0.022                                         |                       |

300 <sup>a</sup> The half-saturation constant  $\kappa$  corresponds to  $\kappa_M$  for the Monod-based model and  $B(t=0) \cdot \kappa_C$  for the  
 301 Contois-based model (where  $B(t=0)$  is the value from the hydrostatic experiments).

302 <sup>b</sup> Values of  $(1/y) \cdot \mu_{max}/\kappa$  correspond respectively to 2.89 10<sup>2</sup>, 2.89 10<sup>3</sup> and 2.89 10<sup>2</sup> l·g<sup>-1</sup>·d<sup>-1</sup> (volume of  
 303 water per mass of bacteria per unit of time).

304 The corresponding spreading values induced by the hydrodynamic dispersion (root-mean-square  
 305 displacements) for each percolation events are respectively 0, 3.8 and 0.91 mm, to be compared to the  
 306 25 mm radius of the soil column.

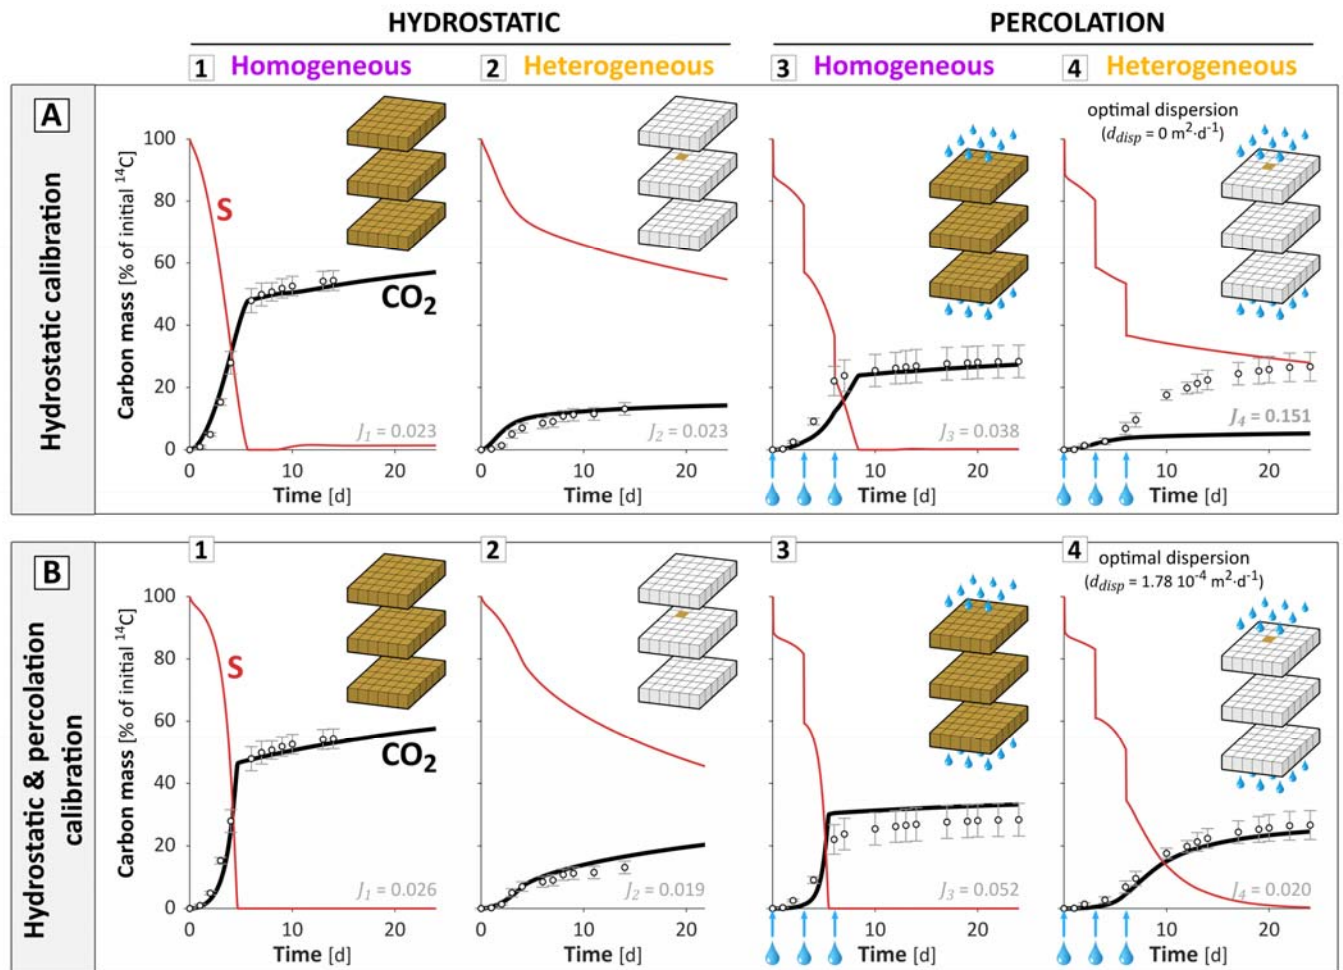

307

308 **Fig. 3.** Mineralization dynamics predicted with the Monod-based model calibrated on the hydrostatic  
 309 experiment only **(A)** and on both hydrostatic and percolation experiments **(B)**. The related experimental  
 310 setups are indicated in the top right corner of each graph. The agreement between experiments and model  
 311 is indicated by the value of discrepancy  $J$  displayed on top and can be visually assessed by the proximity  
 312 between the black line and the dots representing respectively the model results and experimental data.  
 313 The red line refers to the carbon mass of substrate remaining in the soil core. In the percolation  
 314 experiments **(A3,4** and **B3,4)**, around 51% of the initial mass of  $^{14}\text{C}$  was lost through leaching at each

315 percolation events ( $t = 0, 3$  and  $6$  days, blue arrows). The carbon balance among the different pools is  
316 detailed in **Fig. S7**. Note that the reversible sorption eventually accounted for less than 2% of the initial  
317 carbon mass and therefore did not significantly alter the results.

## 318 **3.2. Analysis of the controls exerted on degradation by substrate dilution and bacterial** 319 **density**

320 The effect of dispersion on degradation differed greatly between the two calibrated sets of biological  
321 parameters described in section 3.1. We therefore conducted a more systematic investigation of the  
322 coupled impact of bacterial dispersion and bacterial traits on degradation, revealing its control by substrate  
323 dilution and bacterial density.

### 324 *3.2.1 Impact of dispersion on degradation*

325 We used the mineralization at the end of the experimental time (day 24) as a proxy for degradation and  
326 determined its sensitivity to dispersion, as a function of the parameterization of bacterial traits. **Fig. 4**  
327 shows the impact of the dispersion coefficient  $d_{disp}$  on the final predicted mineralization for the two  
328 calibrated biological parameter sets, all other parameters being kept constant (thick red and blue lines). For  
329 the biological parameter set calibrated on hydrostatic experiments, the final mineralization decreased  
330 monotonically with dispersion (**Fig. 4**, red line). For the parameter set calibrated on both hydrostatic and  
331 percolation experiments, the final mineralization first increased, reached a maximum around  
332  $d_{disp} \approx 10^{-4} \text{ m}^2 \cdot \text{d}^{-1}$  and then decreased (**Fig. 4**, blue line). These two kinds of behaviors were observed  
333 regardless of the parameters  $\alpha$ ,  $(1/y) \cdot \mu_{max}$  and  $B(t=0)$  as long as  $(1/y) \cdot \mu_{max} / \kappa_M$  remained the same  
334 (**Fig. S8**). The non-monotonic impact of dispersion on degradation highlights the existence of an optimal  
335 bacterial dispersion for which mineralization is the highest. The comparison between the red and blue lines  
336 on **Fig. 4** suggests that the optimal dispersion value depends on the bacterial uptake efficiency. Note that,

337 although the optimal dispersion value varied with time due to the spatial dynamics of both bacteria and  
338 substrate (**Fig. S9**), it tended towards a limit that was mostly reached within 4 to 7 days and is thus  
339 represented at day 24 on **Fig. 4**.

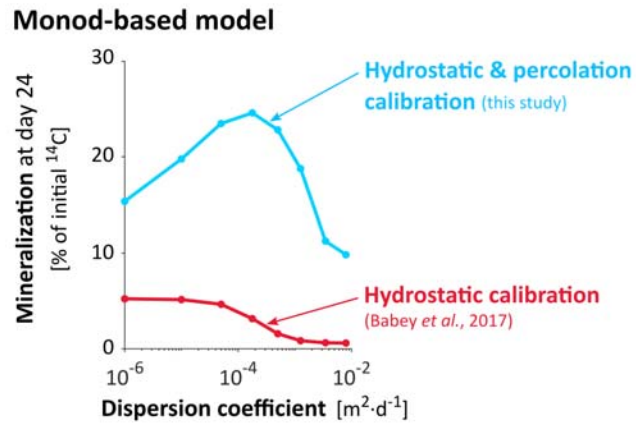

340  
341 **Fig. 4.** Influence of the dispersion coefficient  $d_{disp}$  on mineralization predicted at day 24  $m_{CO_2}(t=24)$  for the  
342 biological parameter set calibrated on the sole hydrostatic experiments (**A**, thick red line) and on both  
343 hydrostatic and percolation experiments (**B**, thick blue line). Note that for the model calibrated on both  
344 hydrostatic and percolation experiments, the value of  $d_{disp}$  leading to the highest final mineralization  
345 ( $d_{disp} = 1.78 \cdot 10^{-4} m^2 \cdot d^{-1}$ , thick blue line) is also equal to its calibrated value leading to the best adequacy with  
346 mineralization kinetics (**Table 2**).

### 347 3.2.2 Double control of degradation by substrate dilution and bacterial density

348 The non-monotonic effect of bacterial dispersion on degradation is an unusual and key feature of the  
349 model calibrated on both hydrostatic and percolation experiments. In the following we will present an  
350 explanation for how such relationships between dispersion and degradation could arise, resulting from a  
351 non-monotonic spatial substrate profile, itself derived from the respective effects of substrate dilution and  
352 bacterial density.

353 In the model, the instant exposure of bacteria to their substrate is maximal if all the bacteria are located  
354 inside the voxel(s) with the highest substrate concentration. In the hydrostatic calibrated parameter set,  
355 the profile of substrate concentration primarily resulted from its initial heterogeneity (bell-shape red curve  
356 on **Fig. 5A** and pseudo bell-shape red curve on **Fig. 5B**). The flux of substrate reaching each bacterium was  
357 therefore mostly determined by the distance between the bacterium and the initial location of substrate.  
358 The exposure of a single bacterium to the substrate decreased with its distance from the substrate initial  
359 location. This effect is referred to as “substrate dilution”. In these cases (**Fig. 5A** and **B**), mineralization was  
360 mainly regulated by substrate dilution, and therefore reduced by bacterial dispersion (**Fig. 4**, blue line).  
361 However, for the parameter set calibrated on both hydrostatic and percolation experiments, local  
362 degradation by aggregated bacteria reshaped the substrate spatial profile, thus critically changing the  
363 voxel(s) with the highest substrate concentration. The bacteria aggregated at their initial location  
364 consumed the substrate much faster than it was replenished by backward diffusion and dispersion,  
365 creating a critical inversion of the substrate gradient, which led to an intra-population competition for  
366 substrate (**Fig. 5C**). The competition was critical for bacterial densities as small as  $3.5 \cdot 10^{-3} \text{ g} \cdot \text{l}^{-1}$  (**Fig. 5C**). In  
367 contrast, the dispersion of bacteria reduced competition by diluting the highest bacterial densities, thus  
368 flattening the substrate gradient inversion induced by bacterial local degradation, resulting in a better  
369 overall exposure of bacteria to the substrate concentrations, and thus an enhanced mineralization  
370 (**Fig. 5D**). In these cases (**Fig. 5C** and **D**), mineralization was mainly regulated by bacterial density. This  
371 relation between the bacterial density and the limitation of their exposure to the substrate is not  
372 instantaneous and is mediated by the substrate concentration. This is expressed in the model equations  
373 through the dependence of bacterial activity  $\mu(t)$  on substrate concentration  $S(t)$  (Eq. (7)) and the  
374 dependence of the substrate concentration  $S(t)$  on degradation  $\mu(t) \cdot B(t)$  (Eq. (1)), within each voxel.  
375 However, when bacterial dispersion was too great, substrate dilution became the dominant control again.  
376 This suggests that an optimal bacterial spatial spread exists for which the dilution of substrate is

377 compensated by the dilution of high local bacterial densities. The modeled scenario illustrated by the two  
 378 calibrated parameter sets were also observed for most of the other parameter sets. The optimal dispersion  
 379 coefficient for the 300 best-fitting parameterizations to both hydrostatic and percolation experiments  
 380 (smallest  $J_{1234}$  values) was on average  $d_{disp} \approx 2 \cdot 10^{-5} \text{ m}^2 \cdot \text{d}^{-1}$  (**Fig. S10**), corresponding to a root-mean-square  
 381 displacement of bacteria of 1.5 to 3.5 mm during each percolation event.

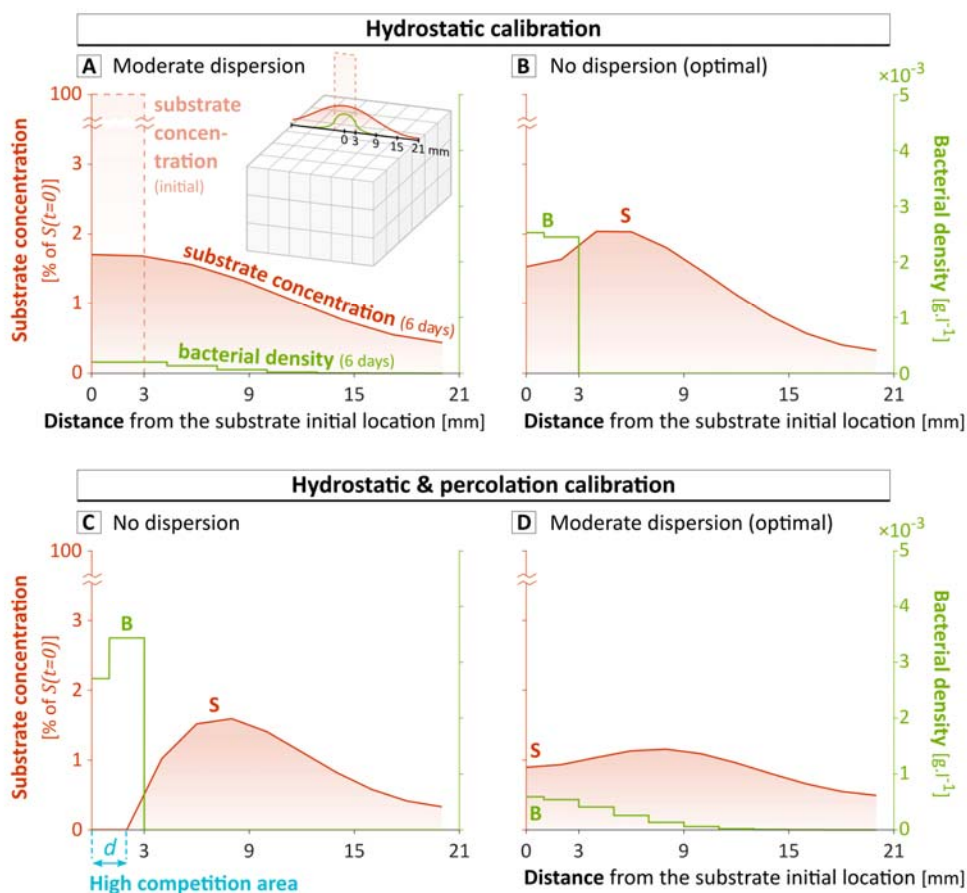

382  
 383 **Fig. 5.** Predicted substrate and bacterial spatial concentration profiles after 6 days of diffusion and  
 384 dispersion in the conditions of heterogeneous percolation experiment, in which bacteria and substrate are  
 385 initially located exclusively in the central cube (between 0 and 3 mm). Results are simulated on a  
 386  $9 \times 18 \times 18$  grid obtained by subdividing the  $3 \times 6 \times 6$  grid used for the screenings. The results are  
 387 represented for the parameter set calibrated using only the sole hydrostatic experiment, either with a  
 388 moderate dispersion ( $d_{disp} = 1.78 \cdot 10^{-4} \text{ m}^2 \cdot \text{d}^{-1}$ ) (A) or with the calibrated dispersion (no dispersion) (B), and

389 for the biological parameter set calibrated on both hydrostatic and percolation experiments, either without  
390 dispersion (C) or with the calibrated dispersion ( $d_{disp} = 1.78 \cdot 10^{-4} \text{ m}^2 \cdot \text{d}^{-1}$ ) (D). On one hand, bacteria are  
391 exposed to smaller substrate concentrations if they are far from the source (right part of the substrate  
392 concentration profiles). On the other hand, bacteria undergo competition if they are too close from each  
393 other (left part of the substrate concentration profiles). In (C), the bacteria aggregated below  $d$  consume  
394 the substrate faster than it is replenished by backward diffusion and dispersion. The total number of  
395 bacteria within the whole soil column at day 6 is similar in (A), (B), (C) and (D), respectively equal to  $6.0 \cdot 10^5$ ,  
396  $9.5 \cdot 10^5$ ,  $11.5 \cdot 10^5$  and  $11.3 \cdot 10^5$ . The final mineralization at day 24 is however strongly different between  
397 scenario, reaching respectively 3.2%, 5.3%, 9.1% and 24.7% of the initial mass of  $^{14}\text{C}$ .

### 398 3.2.3 *Effect of bacterial uptake efficiency on the impact of dispersion on degradation*

399 A non-monotonic substrate concentration profile only occurs when bacterial degradation locally depletes  
400 the substrate faster than it is replenished by diffusion. This area of high local competition for substrate  
401 results from either high local densities of bacteria or high competitiveness or both. Bacterial  
402 competitiveness is related to their maximum uptake efficiency  $(1/y) \cdot \mu_{max}/K_M$ , which also describes their  
403 capacity to maintain their activity and growth under dilute substrate concentrations (Healey, 1980; Button,  
404 1991; Lobry et al., 1992). Bacteria with high maximum uptake efficiency are thus expected to benefit more  
405 from dispersion. **Fig. 6** shows the optimal dispersion coefficient as a function of the maximum uptake  
406 efficiency, with all other parameters equal to those of the model calibrated on both hydrostatic and  
407 percolation experiments. The optimal dispersion coefficient, defined as the dispersion coefficient  
408 maximizing the final mineralization, increased with the maximum uptake efficiency. For small maximum  
409 uptake efficiencies of  $30 \text{ l} \cdot \text{g}^{-1} \cdot \text{d}^{-1}$  and below, mineralization was highest in the absence of dispersion,  
410 suggesting a regulation dominated by substrate dilution. For larger maximum uptake efficiencies,  
411 dispersion impacted positively mineralization, suggesting that degradation shifted from being regulated by



112 substrate dilution to being regulated by bacterial densities, as bacteria were both more prone to  
113 competition between themselves and more efficient under diluted substrate conditions. In other words,  
114 the proximity to other bacteria constrained activity more than the proximity to the substrate initial location  
115 enhanced it. This combined effect of the maximum uptake efficiency and the bacterial dispersion on  
116 degradation was a general relationship common to all parameterizations (**Fig. S11**).

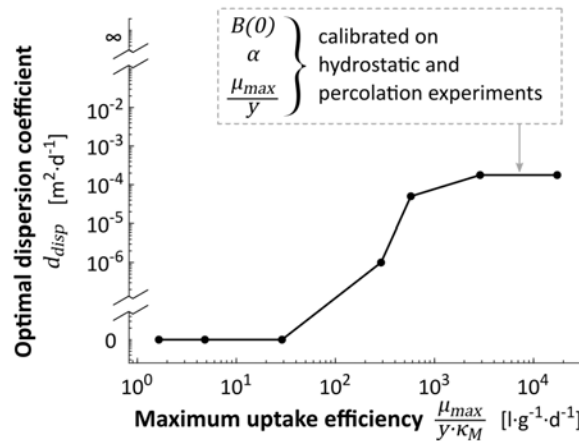

117

118 **Fig. 6.** Dispersion coefficient giving the highest predicted mineralization at day 24 as a function of  
119 maximum uptake efficiency, all other parameters equal to those of the model calibrated on both  
120 hydrostatic and percolation experiments.

### 121 3.3. The Contois-based model as an alternative to Monod

122 Given that degradation is regulated by both substrate dilution and bacterial density, and that their relative  
 123 importance is modulated by bacterial uptake efficiency at the lowest substrate concentration,  
 124  $(1/y) \cdot \mu_{max}/\kappa_M$ , we investigated the relevance of the Contois model by applying the calibration methodology  
 125 of section 2.4, as used in section 3.1. The interest in the Contois growth law (Eq. (8)) stems from the  
 126 inclusion of a regulation by density in the expression of the uptake efficiency at the lowest substrate  
 127 concentration, becoming  $(1/y) \cdot \mu_{max}/(B(t) \cdot \kappa_C)$ .

128 In comparison with the Monod-based model, the predictions of the experimental observations of Pinheiro  
 129 et al. (2015, 2019) were facilitated with the Contois-based model, on three levels. First, the Contois-based  
 130 model captured the degradation dynamics better than the Monod-based model, especially for the 1%  
 131 best-fitting parameterizations (smallest  $J_{1234}$  values) (**Fig. S12**). The calibrated Contois-based model had an  
 132 overall discrepancy of  $J_{1234} = 0.022$  (**Fig. 7**), which was smaller than the lowest value of  $J_{1234} = 0.032$   
 133 obtained for the calibrated Monod-based model (**Fig. 3**).

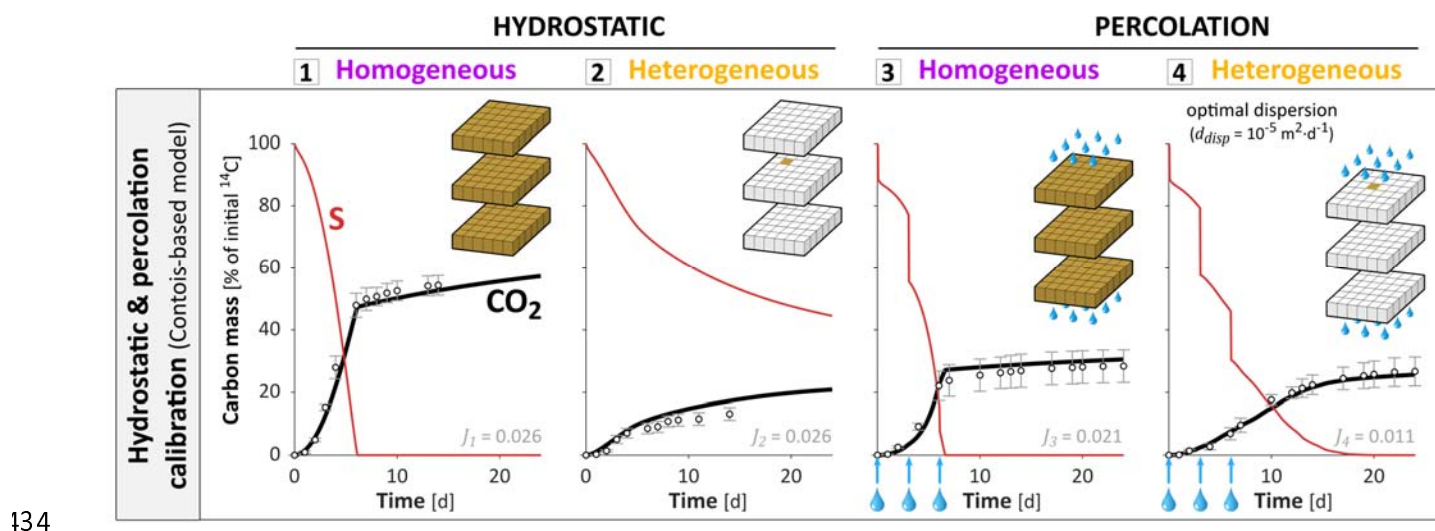

135 **Fig. 7.** Mineralization dynamics predicted with the Contois-based model calibrated on both hydrostatic and  
136 percolation experiments. For representation and legend, see **Fig. 3**. The carbon balance among the  
137 different pools is detailed in **Fig. S7**.

138 Second, the parameter sets that fitted homogeneous experiments also performed well under  
139 heterogeneous conditions, as long as the dispersion coefficient  $d_{disp}$  was calibrated as well (**Fig. S13**). It is  
140 an important advantage as it confers a better capacity to predict degradation kinetics for heterogeneous  
141 and varying distributions, once the model is calibrated in homogeneous conditions, which are more  
142 appropriate for the experimental measurement of bacterial parameters. Besides, using a dispersion  
143 coefficient value different from the calibrated one weakened the predictions of the mineralization  
144 dynamics but not the predictions of the mineralization after 24 days, which remained satisfying regardless  
145 of the dispersion coefficient. More precisely, the prediction of the final mineralization became mostly  
146 independent of the dispersion coefficient, as shown for the calibrated model (**Fig. 8**). This is because, in the  
147 Contois model at low substrate concentrations, the number of active bacteria in a soil volume is exactly  
148 counterbalanced by the regulation of their uptake efficiency by population density (Eq. (8)), resulting in  
149 limited effects of bacterial spreading on overall mineralization (**Fig. 8**, constant part of the curves).

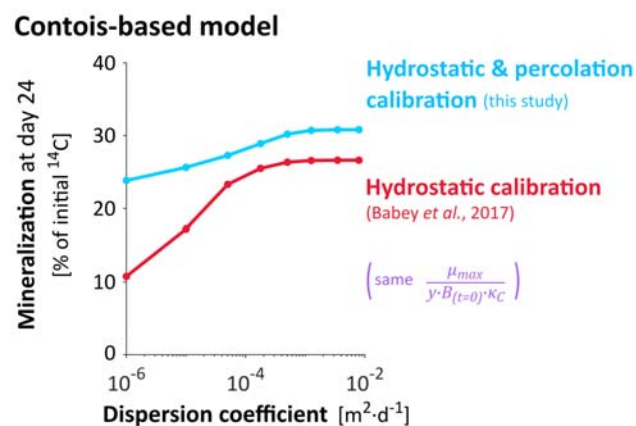

150

151 **Fig. 8.** Influence of the dispersion coefficient on mineralization at day 24 for the Contois-based models  
152 calibrated on the sole hydrostatic experiments (thick red line) and on both hydrostatic and percolation  
153 experiments (thick blue line). For representation and legend, see **Fig. 4.**

## 154 **4. Discussion**

### 155 **4.1. Relevance of density control for 2,4-D degradation and soil carbon cycling**

#### 156 *4.1.1 Density control of soil oligotroph bacteria*

157 Bulk soil and highly-diluted environments are usually found to be dominated by bacteria with high  
158 maximum uptake efficiency, also called oligotrophs (Fierer et al., 2007; Nunan et al., 2020). Their high  
159 maximum uptake efficiency differentiates their life-history strategies and conditions their ability to thrive in  
160 resource poor environments (Button, 1993), also assimilated to K-strategy (Tecon and Or, 2017), by  
161 opposition to copiotrophic bacteria adapted to rich environments (r-strategy). The maximum uptake  
162 efficiency values of the 1% best-fitting parameter sets were of the order of  $10^3$ - $10^4$  l·g<sup>-1</sup>·d<sup>-1</sup> (volume of  
163 water per mass of bacteria per unit of time), within the range proposed by Button (1991) to define  
164 oligotrophs. Similar or higher maximum uptake efficiency values of the order of  $10^4$ - $10^5$  l·g<sup>-1</sup>·d<sup>-1</sup> have been  
165 reported for soil oligotrophs (Ohta and Taniguchi, 1988; Zelenev et al., 2005). Values up to  $1.64 \cdot 10^5$  have  
166 been reported by Tuxen et al. (2002) for 2,4-D degraders in an aerobic aquifer and even greater values  
167 might also be possible (see section S5). The high maximum uptake efficiencies predicted in section 3.1 for  
168 the best-fitting parameterizations are therefore a plausible bacterial trait among 2,4-D degraders as well as  
169 bulk soil bacteria in general. It suggests that density control might be relevant for a component of soil  
170 bacteria, which would benefit from dispersion as suggested by **Fig. 6.** The calibrated model has shown in  
171 section 3.2.2 that the values of densities from which competition became critical were around  $3.5 \cdot 10^{-3}$  g·l<sup>-1</sup>,  
172 corresponding to  $7.5 \cdot 10^{-7}$  g·g (mass of bacteria per mass of dry soil), ranging in the low end of usual total

173 soil bacterial densities (Raynaud and Nunan, 2014; Kuzyakov and Blagodatskaya, 2015). This suggests that  
174 competition might play a significant role even under the low bacterial densities observed in bulk soils.  
175 Reciprocally, the model suggests that competition for substrate between copiotrophic bacteria only  
176 appears at much larger population densities, such as those found in soil biofilms (Holden et al., 1997, Or et  
177 al., 2007). Interestingly, copiotrophic bacteria have been reported to cohabit with oligotrophic bacteria  
178 even in diluted environments (Gözdereliler et al., 2012). Results from the screening suggest that, for  
179 densities of copiotrophs as low as for oligotrophs, their impact on overall decomposition in  
180 dilution-dominated environments would be much lower due to their poorly adapted uptake efficiency  
181 (**Fig. 4A**). Conversely, this striking density regulation might be one of the main limitations of the overall  
182 population densities in soils. Note that this density regulation occurs within a single population with  
183 homogeneous biological constants. Spatial heterogeneities and low substrate concentrations, common in  
184 bulk soil, may indeed shift competition from the inter-population level to the intra-population level  
185 (Pfeiffer et al., 2001; Roller and Schmidt, 2015).

#### 186 *4.1.2 A new perspective on Regulatory Gate hypothesis*

187 Density regulation might partially contribute to explain the common paradox of the apparent uncoupling  
188 between the overall mineralization of a soil volume and the size of its microbial population (Kemmitt et al.,  
189 2008). The rate of soil carbon mineralization remains the same even if 90% of the microbial decomposers  
190 are killed. This observation is commonly explained by the Regulatory Gate hypothesis, where  
191 mineralization is assumed to be controlled by an abiotic process, such as desorption or diffusion, that limits  
192 the availability of the substrate, resulting in mineralization rates that are independent of the degrader  
193 abundance. We propose that the density regulation of decomposition in oligotrophic environments may  
194 contribute to this phenomenon, through competition for substrate or other biological interactions. In the  
195 case of competition-related density regulation, it reduces the dependence of the overall carbon  
196 mineralization on degrader abundance, as any increase of population density counterbalances the effect of

197 the increased population size. Note that the involved abiotic process, namely the substrate diffusion  
198 backward to bacteria (see section 3.2), is well limiting but only in situations of high bacterial competition.

#### 199 **4.2. Relevance of the ratio-dependent Contois model in soils**

200 As argued in section 3.3, ratio-dependence might facilitate decomposition modeling in the soil conditions  
201 typical of the experiments analyzed here. The Contois model's  $(1/y) \cdot \mu_{max}/\kappa_C B$  calibrated in homogeneous  
202 conditions might be used in heterogeneous conditions more reliably than the Monod model's  
203  $(1/y) \cdot \mu_{max}/\kappa_M$ , at least for soil systems in which the competition for the substrate plays a substantial role  
204 within the degrader population. The similarity between  $\kappa_M$  and  $\kappa_C B$  suggests the need to consider  
205 population density when measuring the apparent maximum uptake efficiency of soil bacteria to avoid  
206 underestimating it by unintentionally including density regulation. Moreover, the better predictions  
207 obtained with the Contois model in the soil conditions represented by the experiments suggest that the  
208 Contois ratio-dependence includes not only the effect of competition for substrate at the scale of  
209 measurement, but it can also reasonably reflect other density processes such as the spatial variability of  
210 bacterial distributions at finer scales related to their high degree of local aggregation in microcolonies  
211 (Raynaud and Nunan, 2014). Moreover, ratio-dependence may also include the cumulative effects of  
212 ecological interactions other than competition (Sibly and Hone, 2002). Note that the methodological  
213 approach used in this study for both Monod and Contois models is based on an effective representation of  
214 concentrations and parameters at the mm- to cm-scale of measurements. These effective concentrations  
215 and parameters conceptually integrate the smaller-scale processes highlighted by other studies (Ebrahimi  
216 and Or, 2014; Portell et al., 2018; Tecon et al., 2018). Such microscale processes should be addressed for  
217 further generalization beyond the conditions of the soil experiments analyzed here. Despite its advantages,  
218 Contois models have also a drawback with the fact that the modeled uptake efficiency of bacteria  
219 approaches infinity for low densities, which does not correspond to any physical nor biochemical process

520 (Gleeson, 1994; Abrams, 2015). However, this side effect mostly affects a negligible fraction of the bacteria  
521 and the substrate, as it was the case in the soil conditions represented by the experiments.

522 Further work is required to confront the relevance of the Contois model to other soil systems. To the best  
523 of our knowledge, ratio-dependent growth models such as the Contois model have not yet been  
524 considered for the modeling of microbial degradation in soils. However, the Contois growth equation is  
525 generally accepted to be more appropriate than the Monod equation for modeling immobilized,  
526 heterogeneously distributed or mixed microbial cultures (Arditi and Saiah, 1992; Harmand and Godon,  
527 2007), all of which are characteristics of soils. The regulation of individual activity by population density has  
528 frequently been justified as a “crowding effect” associated with high population densities leading to  
529 competition for substrate (Lobry and Harmand, 2006; Harmand and Godon, 2007; Krichen et al., 2018).  
530 However, little is known about possible density regulation when apparent microbial densities are low, as is  
531 observed in bulk soil (Raynaud and Nunan, 2014; Kuzyakov and Blagodatskaya, 2015), although some  
532 studies have mentioned ratio-dependence in highly-diluted environments such as aquifers (Hansen et al.,  
533 2017). As discussed in section 4.1.1, the high maximum uptake efficiencies commonly observed for soil  
534 bacteria adapted to oligotrophic environments are relevant to draw attention on the potential significance  
535 of density control at low densities in oligotrophic soils, and thus ratio-dependent models, among which the  
536 Contois model is a consistent choice.

### 537 ***4.3. Hypothetical relationship between bacterial traits and their spatial strategies***

538 Density regulation might be at the origin of a relationship between bacterial oligotrophy, their location in  
539 soil and their mobility strategy. Soil copiotroph bacteria have a maximum uptake efficiency mostly between  
540  $100 \text{ l}\cdot\text{g}^{-1}\cdot\text{d}^{-1}$  (Button, 1991) and  $800 \text{ l}\cdot\text{g}^{-1}\cdot\text{d}^{-1}$  (Daugherty and Karel, 1994; Zelenev et al., 2005). For  
541 copiotrophs with maximum uptake efficiency values below  $288 \text{ l}\cdot\text{g}^{-1}\cdot\text{d}^{-1}$ , bacterial dispersion was largely  
542 detrimental to their activity (**Fig. 4** blue line, **Fig. 6**), in agreement with the results of Pagel et al. (2020),

543 suggesting that copiotrophs have more aggregated distributions than oligotrophs. The negligible  
544 mineralization even without dispersion (**Fig. 3-A4, Fig. S8**) also highlights the fact that copiotrophs are  
545 particularly inefficient at degrading substrates that diffuse in the environment, as also evidenced by Babey  
546 et al. (2017). To maintain significant activity, soil copiotrophs are likely to remain immobile in the close  
547 surroundings of the substrate source or any immobile substrate, likely attached to surfaces or embedded in  
548 EPS matrices. If not, they would be dispersed towards more diluted area where their low maximum uptake  
549 efficiency would result in negligible uptake. On the contrary, to survive and develop, soil oligotrophs should  
550 be able to easily disperse and escape high competition areas. Given that soil is a poor and heterogeneous  
551 environment, this dispersion would be essentially passive (Nunan et al., 2020), through advective processes  
552 for example. We therefore suggest the existence of a theoretical relationship between proximity to  
553 substrate sources (respectively remoteness), copiotrophy (respectively oligotrophy) and attachment  
554 (respectively mobility).

## 555 **5. Conclusions**

556 Heterogeneous distributions of degraders and substrate in soils strongly control soil organic matter  
557 degradation through their interactions with the bacterial activity. Taking 2,4-D as a model organic solute  
558 substrate for soil bacteria, we investigated the coupled effects of bacteria and substrate distributions on  
559 one side and bacterial traits on the other side on substrate degradation. The analysis of published  
560 experiments with contrasted spreading conditions of both bacteria and substrate reveals that, in addition  
561 to the distance of bacteria from high substrate concentrations, mineralization is also surprisingly limited by  
562 the bacterial density even under the low bacterial densities commonly observed in bulk soils. Moreover,  
563 the impact of bacterial dispersion on solute substrate degradation can shift from negative to positive  
564 depending on the bacterial maximum uptake efficiency. The activity of soil oligotrophs may be mostly  
565 regulated by bacterial density rather than by substrate dilution, echoing the population size paradox



566 regularly observed. It follows that the ratio-dependent Contois model might be more relevant to model  
567 bulk soil mineralization in the heterogeneous conditions investigated than the substrate-dependent Monod  
568 model. To predict the impact of spatial distributions on degradation in oligotrophic soil, and more  
569 particularly the impact of bacterial dispersion, we suggest that bacterial densities might be a more useful  
570 measurement than the volumes of soil devoid or occupied with bacteria. With respect to the current lack  
571 of direct microscale data on microbial processes and distributions, we propose some key perspectives on  
572 the bacterial kinetics and distributions.

## 573 **Acknowledgements**

574 This work was supported by the Agence Nationale de la Recherche through the project “Soil $\mu$ -3D” [grant  
575 number ANR-15-CE01-0006] and was also partially supported by the SLAC Floodplain Hydro-  
576 Biogeochemistry Science Focus Area (SFA), which is funded by the U.S. Department of Energy (DOE) office  
577 of Biological and Environmental Research (BER), Climate and Environmental Sciences Division, under DOE  
578 contract No. DE- AC02-76SF00515 to SLAC. The authors thank Jérôme Harmand, Théodore Bouchez, Xavier  
579 Raynaud, Tanguy Le Borgne, Claire Chenu and Holger Pagel for insightful discussions.

## 580 **Appendix A. Supplementary data**

### 581 **References**

582 Abbott, A.J., Nelsestuen, G.L., 1988. The collisional limit: an important consideration for  
583 membrane-associated enzymes and receptors. *The FASEB Journal* 2, 2858–2866.  
584 <https://doi.org/10.1096/fasebj.2.13.2844615>

- 585 Abrams, P.A., 2015. Why ratio dependence is (still) a bad model of predation: Ratio-dependent predation.  
586 *Biological Reviews* 90, 794–814. <https://doi.org/10.1111/brv.12134>
- 587 Arditi, R., Saiah, H., 1992. Empirical evidence of the role of heterogeneity in ratio-dependent consumption.  
588 *Ecology* 73, 1544–1551. <https://doi.org/10.2307/1940007>
- 589 Babey, T., Vieublé Gonod, L., Rapaport, A., Pinheiro, M., Garnier, P., de Dreuzy, J.-R., 2017. Spatiotemporal  
590 simulations of 2,4-D pesticide degradation by microorganisms in 3D soil-core experiments.  
591 *Ecological Modelling* 344, 48–61. <https://doi.org/10.1016/j.ecolmodel.2016.11.006>
- 592 Bælum, J., Henriksen, T., Hansen, H.C.B., Jacobsen, C.S., 2006. Degradation of 4-chloro-2-  
593 methylphenoxyacetic acid in top- and subsoil is quantitatively linked to the class III *tfdA* gene.  
594 *Applied and Environmental Microbiology* 72, 1476–1486. [https://doi.org/10.1128/AEM.72.2.1476-](https://doi.org/10.1128/AEM.72.2.1476-1486.2006)  
595 [1486.2006](https://doi.org/10.1128/AEM.72.2.1476-1486.2006)
- 596 Bælum, J., Nicolaisen, M.H., Holben, W.E., Strobel, B.W., Sørensen, J., Jacobsen, C.S., 2008. Direct analysis  
597 of *tfdA* gene expression by indigenous bacteria in phenoxy acid amended agricultural soil. *The ISME*  
598 *Journal* 2, 677–687. <https://doi.org/10.1038/ismej.2008.21>
- 599 Balkwill, D.L., Leach, F.R., Wilson, J.T., McNabb, J.F., White, D.C., 1988. Equivalence of microbial biomass  
600 measures based on membrane lipid and cell wall components, adenosine triphosphate, and direct  
601 counts in subsurface aquifer sediments. *Microbial Ecology* 16, 73–84.  
602 <https://doi.org/10.1007/BF02097406>
- 603 Boivin, A., Amellal, S., Schiavon, M., van Genuchten, M.Th., 2005. 2,4-dichlorophenoxyacetic acid (2,4-D)  
604 sorption and degradation dynamics in three agricultural soils. *Environmental Pollution* 138, 92–99.  
605 <https://doi.org/10.1016/j.envpol.2005.02.016>
- 606 Breitenbeck, G.A., Yang, H., Dunigan, E.P., 1988. Water-facilitated dispersal of inoculant *Bradyrhizobium*  
607 *japonicum* in soils. *Biology and Fertility of Soils* 7, 58–62. <https://doi.org/10.1007/BF00260733>

- 508 Bünemann, E.K., Bongiorno, G., Bai, Z., Creamer, R.E., De Deyn, G., de Goede, R., Fleskens, L., Geissen, V.,  
509 Kuyper, T.W., Mäder, P., Pulleman, M., Sukkel, W., van Groenigen, J.W., Brussaard, L., 2018. Soil  
510 quality – A critical review. *Soil Biology and Biochemistry* 120, 105–125.  
511 <https://doi.org/10.1016/j.soilbio.2018.01.030>
- 512 Button, D.K., 1978. On the theory of control of microbial growth kinetics by limiting nutrient  
513 concentrations. *Deep Sea Research* 25, 1163–1177. [https://doi.org/10.1016/0146-6291\(78\)90011-5](https://doi.org/10.1016/0146-6291(78)90011-5)
- 514 Button, D.K., 1983. Differences between the kinetics of nutrient uptake by micro-organisms, growth and  
515 enzyme kinetics. *Trends in Biochemical Sciences* 8, 121–124. [https://doi.org/10.1016/0968-](https://doi.org/10.1016/0968-0004(83)90232-3)  
516 [0004\(83\)90232-3](https://doi.org/10.1016/0968-0004(83)90232-3)
- 517 Button, D.K., 1991. Biochemical basis for whole-cell uptake kinetics: specific affinity, oligotrophic capacity,  
518 and the meaning of the michaelis constant. *Applied and Environmental Microbiology* 57, 2033–  
519 2038.
- 520 Button, D.K., 1993. Nutrient-limited microbial growth kinetics: overview and recent advances. *Antonie van*  
521 *Leeuwenhoek* 63, 225–235. <https://doi.org/10.1007/BF00871220>
- 522 Carayrou, J., Mosé, R., Behra, P., 2004. Operator-splitting procedures for reactive transport and  
523 comparison of mass balance errors. *Journal of Contaminant Hydrology* 68, 239–268.  
524 [doi:10.1016/S0169-7722\(03\)00141-4](https://doi.org/10.1016/S0169-7722(03)00141-4)
- 525 Cheyns, K., Mertens, J., Diels, J., Smolders, E., Springael, D., 2010. Monod kinetics rather than a first-order  
526 degradation model explains atrazine fate in soil mini-columns: Implications for pesticide fate  
527 modelling. *Environmental Pollution* 158, 1405–1411. <https://doi.org/10.1016/j.envpol.2009.12.041>
- 528 Contois, D.E., 1959. Kinetics of bacterial growth: relationship between population density and specific  
529 growth rate of continuous cultures. *Journal of General Microbiology* 21, 40–50.  
530 <https://doi.org/10.1099/00221287-21-1-40>

- 531 Daugherty, D.D., Karel, S.F., 1994. Degradation of 2,4-dichlorophenoxyacetic acid by *Pseudomonas cepacia*  
532 DBOI(pRO101) in a dual-substrate chemostat. *Applied and Environmental Microbiology* 60, 3261–  
533 3267.
- 534 Dechesne, A., Owsianiak, M., Bazire, A., Grundmann, G.L., Binning, P.J., Smets, B.F., 2010. Biodegradation in  
535 a partially saturated sand matrix: compounding effects of water content, bacterial spatial  
536 distribution, and motility. *Environmental Science & Technology* 44, 2386–2392.  
537 <https://doi.org/10.1021/es902760y>
- 538 Dechesne, A., Badawi, N., Aamand, J., Smets, B.F., 2014. Fine scale spatial variability of microbial pesticide  
539 degradation in soil: scales, controlling factors, and implications. *Frontiers in Microbiology* 5, 667.  
540 <https://doi.org/10.3389/fmicb.2014.00667>
- 541 Desmond-Le Quéméner, E., Bouchez, T., 2014. A thermodynamic theory of microbial growth. *The ISME*  
542 *Journal* 8, 1747–1751. doi:10.1038/ismej.2014.7
- 543 Don, R.H., Weightman, A.J., 1985. Transposon mutagenesis and cloning analysis of the pathways for  
544 degradation of 2,4-dichlorophenoxyacetic acid and 3-chlorobenzoate in *Alcaligenes eutrophus*  
545 JMP134(pJP4). *Journal of Bacteriology* 161, 85–90.
- 546 Ebrahimi, A.N., Or, D., 2014. Microbial dispersal in unsaturated porous media: Characteristics of motile  
547 bacterial cell motions in unsaturated angular pore networks. *Water Resources Research* 50, 7406–  
548 7429. doi:10.1002/2014WR015897
- 549 Fierer, N., Bradford, M.A., Jackson, R.B., 2007. Toward an ecological classification of soil bacteria. *Ecology*  
550 88, 1354–1364. <https://doi.org/10.1890/05-1839>
- 551 Gleeson, S.K., 1994. Density dependence is better than ratio dependence. *Ecology* 75, 1834–1835.  
552 <https://doi.org/10.2307/1939642>

- 353 Gözdereliler, E., Boon, N., Aamand, J., De Roy, K., Granitsiotis, M.S., Albrechtsen, H.J., Sørensen, S.R., 2012.  
354 Comparing metabolic functionality, community structure and dynamics of herbicide-degrading  
355 communities. *Applied and Environmental Microbiology*.
- 356 Haegeman, B., Rapaport, A., 2008. How flocculation can explain coexistence in the chemostat. *Journal of*  
357 *Biological Dynamics* 2, 1–13. <https://doi.org/10.1080/17513750801942537>
- 358 Hammond, E.C., 1938. Biological effects of population density in lower organisms. *The Quarterly Review of*  
359 *Biology* 13, 421–438. <http://www.jstor.org/stable/2808555>
- 360 Hansen, S.K., Pandey, S., Karra, S., Vesselinov, V.V., 2017. CHROTRAN: A mathematical and computational  
361 model for in situ heavy metal remediation in heterogeneous aquifers. ArXiv:1703.01381 [q-Bio].
- 362 Harmand, J., Godon, J.J., 2007. Density-dependent kinetics models for a simple description of complex  
363 phenomena in macroscopic mass-balance modeling of bioreactors. *Ecological Modelling* 200, 393–  
364 402. <https://doi.org/10.1016/j.ecolmodel.2006.08.012>
- 365 Healey, F.P., 1980. Slope of the Monod equation as an indicator of advantage in nutrient competition.  
366 *Microbial Ecology* 5, 281–286. <http://www.jstor.org/stable/4250586>
- 367 Holden, P.A., Firestone, M.K., 1997. Soil microorganisms in soil cleanup: How can we improve our  
368 understanding? *Journal of Environment Quality* 26, 32–40.  
369 <https://doi.org/10.2134/jeq1997.00472425002600010006x>
- 370 Holden, P.A., Hunt, J.R., Firestone, M.K., 1997. Toluene diffusion and reaction in unsaturated *Pseudomonas*  
371 *putida* biofilms. *BIOTECHNOLOGY AND BIOENGINEERING* 56, 15.
- 372 Iserles, A., 2009. *A first course in the numerical analysis of differential equations*, Cambridge University  
373 Press. ed.

- 574 Juyal, A., Otten, W., Falconer, R., Hapca, S., Schmidt, H., Baveye, P.C., Eickhorst, T., 2019. Combination of  
575 techniques to quantify the distribution of bacteria in their soil microhabitats at different spatial  
576 scales. *Geoderma* 334, 165–174. <https://doi.org/10.1016/j.geoderma.2018.07.031>
- 577 Kemmitt, S.J., Lanyon, C.V., Waite, I.S., Wen, Q., Addiscott, T.M., Bird, N.R.A., O'Donnell, A.G., Brookes,  
578 P.C., 2008. Mineralization of native soil organic matter is not regulated by the size, activity or  
579 composition of the soil microbial biomass—a new perspective. *Soil Biology and Biochemistry* 40,  
580 61–73. <https://doi.org/10.1016/j.soilbio.2007.06.021>
- 581 Koch, A.L., 1971. The adaptive responses of *Escherichia coli* to a feast and famine existence, in: *Advances in*  
582 *Microbial Physiology*. Elsevier, pp. 147–217. [https://doi.org/10.1016/S0065-2911\(08\)60069-7](https://doi.org/10.1016/S0065-2911(08)60069-7)
- 583 König, S., Vogel, H.-J., Harms, H., Worrich, A., 2020. Physical, chemical and biological effects on soil  
584 bacterial dynamics in microscale models. *Frontiers in Ecology and Evolution* 8, 53.  
585 <https://doi.org/10.3389/fevo.2020.00053>
- 586 Krichen, E., Harmand, J., Torrijos, M., Godon, J.J., Bernet, N., Rapaport, A., 2018. High biomass density  
587 promotes density-dependent microbial growth rate. *Biochemical Engineering Journal* 130, 66–75.  
588 <https://doi.org/10.1016/j.bej.2017.11.017>
- 589 Kuzyakov, Y., Blagodatskaya, E., 2015. Microbial hotspots and hot moments in soil: Concept & review. *Soil*  
590 *Biology and Biochemistry* 83, 184–199. <https://doi.org/10.1016/j.soilbio.2015.01.025>
- 591 Lagneau, V., van der Lee, J., 2010. Operator-splitting-based reactive transport models in strong feedback of  
592 porosity change: The contribution of analytical solutions for accuracy validation and estimator  
593 improvement. *Journal of Contaminant Hydrology* 112, 118–129. doi:10.1016/j.jconhyd.2009.11.005
- 594 Lobry, C., Harmand, J., 2006. A new hypothesis to explain the coexistence of  $n$  species in the presence of a  
595 single resource. *Comptes Rendus Biologies* 329, 40–46. <https://doi.org/10.1016/j.crv.2005.10.004>

- 596 Lobry, J.R., Flandrois, J.P., Carret, G., Pave, A., 1992. Monod's bacterial growth model revisited. *Bulletin of*  
597 *Mathematical Biology* 54, 117–122. <https://doi.org/10.1007/BF02458623>
- 598 Madsen, E.L., Alexander, M., 1982. Transport of Rhizobium and Pseudomonas through Soil. *Soil Science*  
599 *Society of America Journal* 46, 557–560.  
700 <https://doi.org/10.2136/sssaj1982.03615995004600030023x>
- 701 Monod, J., 1949. The growth of bacterial cultures. *Annual Review of Microbiology* 3, 371–394.  
702 <https://doi.org/10.1146/annurev.mi.03.100149.002103>
- 703 Nelson, M.I., Holder, A., 2009. A fundamental analysis of continuous flow bioreactor models governed by  
704 Contois kinetics. II. Reactor cascades. *Chemical Engineering Journal* 149, 406–416.  
705 <https://doi.org/10.1016/j.cej.2009.01.028>
- 706 Nunan, N., Young, I.M., Crawford, J.W., Ritz, K., 2007. Bacterial interactions at the microscale - Linking  
707 habitat to function in soil, in: Franklin, R., Mills, A. (Eds.), *The Spatial Distribution of Microbes in the*  
708 *Environment*. Springer, Dordrecht, pp. 61–85.
- 709 Nunan, N., Schmidt, H., Raynaud, X., 2020. The ecology of heterogeneity: soil bacterial communities and C  
710 dynamics. *Philosophical Transactions of the Royal Society B: Biological Sciences* 375, 20190249.  
711 <https://doi.org/10.1098/rstb.2019.0249>
- 712 Ohta, H., Taniguchi, S., 1988. Growth characteristics of the soil oligotrophic bacterium: *Agromonas*  
713 *oligotrophica* JCM 1494 on diluted nutrient broth. *The Journal of General and Applied Microbiology*  
714 34, 349–353. <https://doi.org/10.2323/jgam.34.349>
- 715 Or, D., Smets, B.F., Wraith, J.M., Dechesne, A., Friedman, S.P., 2007. Physical constraints affecting bacterial  
716 habitats and activity in unsaturated porous media – a review. *Advances in Water Resources* 30,  
717 1505–1527. doi:10.1016/j.advwatres.2006.05.025

- 718 Pagel, H., Kriesche, B., Uksa, M., Poll, C., Kandeler, E., Schmidt, V., Streck, T., 2020. Spatial control of carbon  
719 dynamics in soil by microbial decomposer communities. *Frontiers in Environmental Science* 8, 2.  
720 <https://doi.org/10.3389/fenvs.2020.00002>
- 721 Pallud, C., Dechesne, A., Gaudet, J.P., Debouzie, D., Grundmann, G.L., 2004. Modification of spatial  
722 distribution of 2,4-dichlorophenoxyacetic acid degrader microhabitats during growth in soil  
723 columns. *Applied and Environmental Microbiology* 70, 2709–2716.  
724 <https://doi.org/10.1128/AEM.70.5.2709-2716.2004>
- 725 Patarinska, T., Dochain, D., Agathos, S.N., Ganovski, L., 2000. Modelling of continuous microbial cultivation  
726 taking into account the memory effects. *Bioprocess Engineering* 22, 517–527.  
727 <https://doi.org/10.1007/s004499900095>
- 728 Pfeiffer, T., Schuster, S., Bonhoeffer, S., 2001. Cooperation and Competition in the Evolution of ATP-  
729 Producing Pathways 292, 5.
- 730 Pieper, D.H., Reineke, W., Engesser, K.-H., Knackmuss, H.-J., 1988. Metabolism of 2,4-  
731 dichlorophenoxyacetic acid, 4-chloro-2-methylphenoxyacetic acid and 2-methylphenoxyacetic acid  
732 by *Alcaligenes eutrophus* JMP 134. *Archives of Microbiology* 150, 95–102.  
733 <https://doi.org/10.1007/BF00409724>
- 734 Pinheiro, M., Garnier, P., Beguet, J., Martin Laurent, F., Vieublé Gonod, L., 2015. The millimetre-scale  
735 distribution of 2,4-D and its degraders drives the fate of 2,4-D at the soil core scale. *Soil Biology and*  
736 *Biochemistry* 88, 90–100. <https://doi.org/10.1016/j.soilbio.2015.05.008>
- 737 Pinheiro, M., Pagel, H., Poll, C., Ditterich, F., Garnier, P., Streck, T., Kandeler, E., Vieublé Gonod, L., 2018.  
738 Water flow drives small scale biogeography of pesticides and bacterial pesticide degraders - A  
739 microcosm study using 2,4-D as a model compound. *Soil Biology and Biochemistry* 127, 137–147.  
740 <https://doi.org/10.1016/j.soilbio.2018.09.024>



- 741 Poll, C., Ingwersen, J., Stemmer, M., Gerzabek, M.H., Kandeler, E., 2006. Mechanisms of solute transport  
742 affect small-scale abundance and function of soil microorganisms in the detritusphere. *European*  
743 *Journal of Soil Science* 57, 583–595. <https://doi.org/10.1111/j.1365-2389.2006.00835.x>
- 744 Portell, X., Pot, V., Garnier, P., Otten, W., Baveye, P.C., 2018. Microscale Heterogeneity of the Spatial  
745 Distribution of Organic Matter Can Promote Bacterial Biodiversity in Soils: Insights From Computer  
746 Simulations. *Frontiers in Microbiology* 9, 1583. doi:10.3389/fmicb.2018.01583
- 747 Rapaport, A., 2018. Properties of the chemostat model with aggregated biomass. *European Journal of*  
748 *Applied Mathematics* 29, 972–990. <https://doi.org/10.1017/S0956792518000141>
- 749 Raynaud, X., Nunan, N., 2014. Spatial Ecology of Bacteria at the Microscale in Soil. *PLoS ONE* 9, e87217.  
750 <https://doi.org/10.1371/journal.pone.0087217>
- 751 Read, C.P., 1951. The “Crowding Effect” in Tapeworm Infections. *The Journal of Parasitology* 37, 174–178.  
752 <https://doi.org/10.2307/3273449>
- 753 Roller, B.R., Schmidt, T.M., 2015. The physiology and ecological implications of efficient growth. *The ISME*  
754 *Journal* 9, 1481–1487. <https://doi.org/10.1038/ismej.2014.235>
- 755 Shampine, L.F., Reichelt, M.W., 1997. The MATLAB ODE Suite. *SIAM Journal on Scientific Computing* 18, 1–  
756 22. <https://doi.org/10.1137/S1064827594276424>
- 757 Sibly, R.M., Hone, J., 2002. Population growth rate and its determinants: an overview. *Philosophical*  
758 *Transactions of the Royal Society of London. Series B: Biological Sciences* 357, 1153–1170.  
759 <https://doi.org/10.1098/rstb.2002.1117>
- 760 Sinton, G.L., Fan, L.T., Erickson, L.E., Lee, S.M., 1986. Biodegradation of 2,4-D and related xenobiotic  
761 compounds. *Enzyme and Microbial Technology* 8, 395–403. [https://doi.org/10.1016/0141-](https://doi.org/10.1016/0141-0229(86)90145-6)  
762 [0229\(86\)90145-6](https://doi.org/10.1016/0141-0229(86)90145-6)

- 763 Smoluchowski, M. v, 1918. Versuch einer mathematischen Theorie der Koagulationskinetik kolloider  
764 Lösungen. Zeitschrift für Physikalische Chemie 92U, 129–168. [https://doi.org/10.1515/zpch-1918-](https://doi.org/10.1515/zpch-1918-9209)  
765 9209
- 766 Tecon, R., Or, D., 2017. Biophysical processes supporting the diversity of microbial life in soil. FEMS  
767 Microbiology Reviews 41, 599–623. <https://doi.org/10.1093/femsre/fux039>
- 768 Tecon, R., Ebrahimi, A., Kleyer, H., Erev Levi, S., Or, D., 2018. Cell-to-cell bacterial interactions promoted by  
769 drier conditions on soil surfaces. Proceedings of the National Academy of Sciences 115, 9791–9796.  
770 doi:10.1073/pnas.1808274115
- 771 Tuxen, N., de Liphay, J.R., Albrechtsen, H.-J., Aamand, J., Bjerg, P.L., 2002. Effect of exposure history on  
772 microbial herbicide degradation in an aerobic aquifer affected by a point source. Environmental  
773 Science & Technology 36, 2205–2212. <https://doi.org/10.1021/es0113549>
- 774 Ugalde-Salas, P., Desmond-Le Quéméner, E., Harmand, J., Rapaport, A., Bouchez, T., 2020. Insights from  
775 Microbial Transition State Theory on Monod’s Affinity Constant. Scientific Reports 10, 5323.  
776 doi:10.1038/s41598-020-62213-6
- 777 Vieublé Gonod, L., Chenu, C., Soulas, G., 2003. Spatial variability of 2,4-dichlorophenoxyacetic acid (2,4-D)  
778 mineralisation potential at a millimetre scale in soil. Soil Biology and Biochemistry 35, 373–382.  
779 [https://doi.org/10.1016/S0038-0717\(02\)00287-0](https://doi.org/10.1016/S0038-0717(02)00287-0)
- 780 Young, I.M., Crawford, J.W., Nunan, N., Otten, W., Spiers, A., 2008. Chapter 4 Microbial distribution in soils,  
781 in: Advances in Agronomy. Elsevier, pp. 81–121. [https://doi.org/10.1016/S0065-2113\(08\)00604-4](https://doi.org/10.1016/S0065-2113(08)00604-4)
- 782 Zelenev, V.V., van Bruggen, A.H.C., Semenov, A.M., 2005. Modeling wave-like dynamics of oligotrophic and  
783 copiotrophic bacteria along wheat roots in response to nutrient input from a growing root tip.  
784 Ecological Modelling 188, 404–417. <https://doi.org/10.1016/j.ecolmodel.2005.01.046>

## 785 **Appendix A. Supplementary Data**
